# Supplementary material for: DNA structure at the plasmid origin-of-transfer indicates its potential transfer range
Source: PubMed Central journal article supplement (PMC5789077; doi:10.1038/s41598-018-20157-y), 2018-01-29
Supplement: 41598_2018_20157_MOESM1_ESM.pdf [file 41598_2018_20157_MOESM1_ESM.pdf]

# **DNA structure at the plasmid origin-of-transfer indicates its potential transfer range**

Jan Zrimec<sup>1,2,\*</sup> & Aleš Lapanje<sup>1,3,4,\*\*</sup>

<sup>1</sup> Institute of Metagenomics and Microbial Technologies, Clevelandska 19, 1000 Ljubljana, Slovenia

<sup>2</sup> Faculty of Health Sciences, University of Primorska, Polje 42, 6320 Izola, Slovenia

<sup>3</sup> Saratov State University, Astrakhanskaya 83, Saratov, Russian Federation

<sup>4</sup> Institute Jozef Stefan, Department of Environmental Sciences, Jamova 39, 1000 Ljubljana, Slovenia

\* Tel.: +386 41 925 729; E-mail address: [janzrimec@gmail.com](mailto:janzrimec@gmail.com)

\*\* Tel.: +386 41 253 526; E-mail address: [lapanje.ales@gmail.com](mailto:lapanje.ales@gmail.com)

## **Supplementary information:**

**Supplementary methods S1 – S3**

**Supplementary figures S1 – S7**

**Supplementary tables S1 – S8**

**References**

## Supplementary methods S1

Tests of normality and equality of variance were rejected at the 0.05 significance level for approximately 70% of the structural variables (Bartlett's test and other normality tests). Box's M test for multivariate normality and equality of covariance could not be performed due to insufficient size of the dataset.

## Supplementary methods S2

The total sum of squares was given by

$$SS_{Total} = \frac{1}{N} \sum_{i=1}^{N-1} \sum_{j=i+1}^N d_{ij}^2, \quad (1)$$

where  $N = an$  was the total number of observations,  $a$  the number of groups,  $n$  the number of observations in each group, and  $d_{ij}$  was the distance between observation  $i = 1, \dots, N$  and observation  $j = 1, \dots, N$ <sup>33</sup>. The within group residual sum of squares was

$$SS_{Within} = \sum_{i=1}^{N-1} \sum_{j=i+1}^N \epsilon_{ij} \frac{d_{ij}^2}{n_k}, \quad (2)$$

where  $\epsilon_{ij}$  was equal to 1 if the observation  $i$  and observation  $j$  were in the same group, otherwise it equaled zero, and  $n_k$  was the number of observations in the  $k$ -th group. Accordingly, the between group sum of squares was

$$SS_{Between} = SS_{Total} - SS_{Within} \quad (3)$$

and a pseudo  $F$  statistic to test the multivariate hypothesis of equivalence of means was constructed according to

$$F = \frac{SS_{Between} / (a-1)}{SS_{Within} / (N-k)}. \quad (4)$$

The distribution of  $F$  under the null hypothesis of no differences among group means was evaluated by performing 1000 bootstrap repetitions, since this procedure resulted in more rigorous statistics and was more accurate than permutations. With individual structural and sequence variables, 3000 bootstrap repetitions were performed to correct for multiple comparisons.  $P$  values were calculated according to

$$P = \frac{(\text{No. of } F_{\text{Bootstrap}} \geq F)}{(\text{Total no. of } F_{\text{Bootstrap}})} . \quad (5)$$

To compare the different data representations,  $F$  was scaled to the interval [0,1] based on the bootstrap distributions defining the maximum (1) and minimum values (0)

$$F_{\text{Scaled}} = \frac{F - \min(F_{\text{Bootstrap}})}{\max(F_{\text{Bootstrap}}) - \min(F_{\text{Bootstrap}})} . \quad (6)$$

The hypothesis that two  $F$  statistics differed significantly was tested by obtaining the distribution of  $F_1 - F_2 > 0$  from bootstrap replicates.

### Supplementary methods S3

The classification tests were evaluated with the following classification measures:

- (i) Average Classification Accuracy ( $ACA$ ), which is the ratio of the number of correctly predicted elements to number of all predictions made,
- (ii) Precision ( $Pre$ ), which is the fraction of predictions that are known to be true (positive predictive value of the classifier),
- (iii) Recall ( $Rec$ ), which is the fraction of known classes that were successfully predicted (true positive rate),
- (iv) Cohen's Kappa statistic ( $CK$ ), which is a measure of the difference between observed agreement of predictions and the expected agreement according to chance alone <sup>38</sup>,
- (v) Matthew correlation coefficient ( $MCC$ ), which is a balanced measure of true and false predictions <sup>39</sup>,
- (vi) Area under ROC curve ( $AUC$ ), which is a measure of the discriminability of classes showing the probability of correct predictions <sup>40,41</sup>.

## Supplementary figures

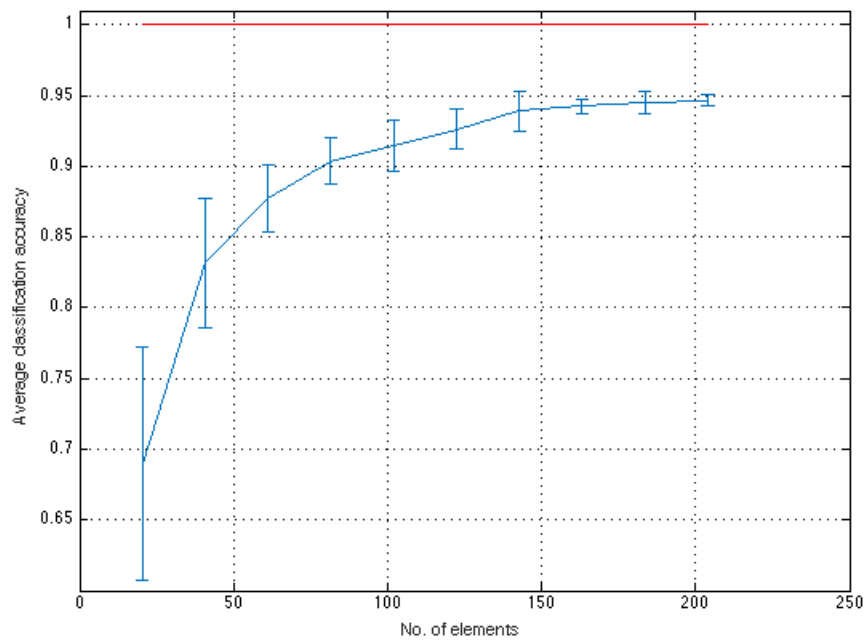

**Figure S1. Learning curves.** Learning curves of training (red – all 100%) and testing with 10-fold cross validations (blue) on dilutions of 204 element dataset (10 repetitions per run, 95% confidence bounds shown).

[Supplementary\\_figure\\_S5A.png](#)  
[Supplementary\\_figure\\_S5B.png](#)  
[Supplementary\\_figure\\_S5C.png](#)  
[Supplementary\\_figure\\_S5D.png](#)  
[Supplementary\\_figure\\_S5E.png](#)  
[Supplementary\\_figure\\_S5F.png](#)  
[Supplementary\\_figure\\_S5G.png](#)  
[Supplementary\\_figure\\_S5H.png](#)

**Figure S2. Dendrograms obtained by clustering of elements.** Clustering was performed with aligned (A-D) and unaligned *oriT* sequences (E-H), based on the p-distance sequence similarity measure and the neighbor joining method (A,B,E,F) and Kimura two-parameter sequence similarity measure and the maximum likelihood method (C,D,G,H). Trees were condensed using a bootstrap confidence threshold value of (A,C,E,G) 80% and (B,D,F,H) 50%. Estimated average classification accuracies were (A)  $0.098 \pm 0.118$ , (B)  $0.110 \pm 0.104$ , (C)  $0.060 \pm 0.032$ , (D)  $0.097 \pm 0.067$ , (E)  $0.063 \pm 0.031$ , (F)  $0.082 \pm 0.045$  (G)  $0.039 \pm 0.011$  and (H)  $0.051 \pm 0.024$  (95% confidence bounds shown).

A.

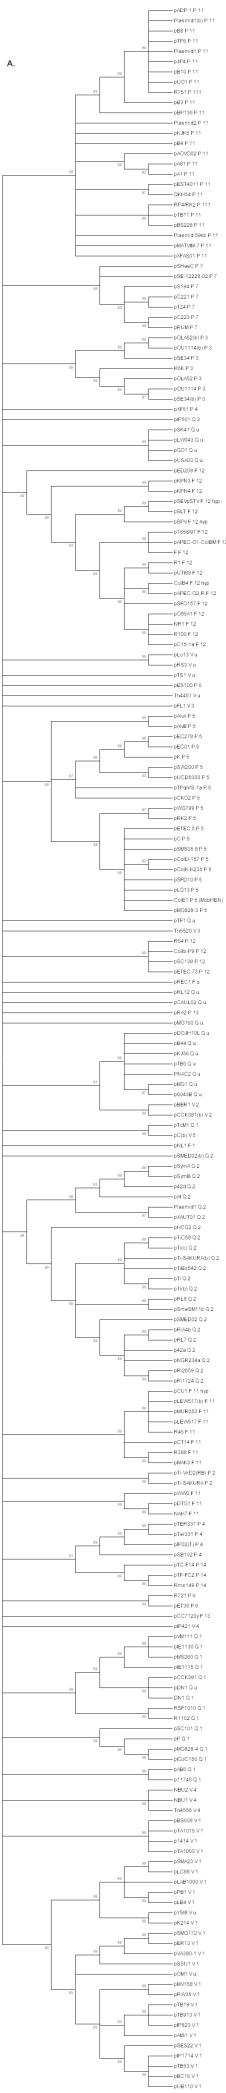

B.

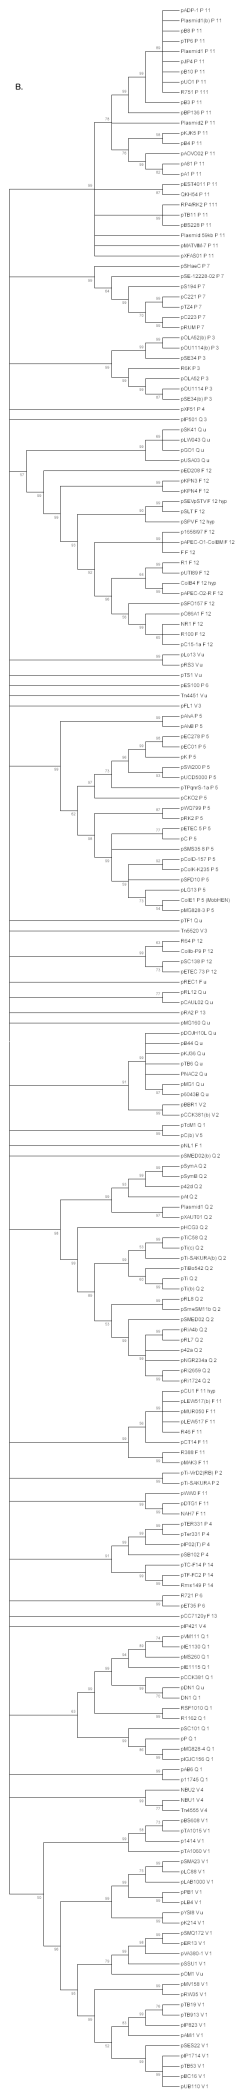





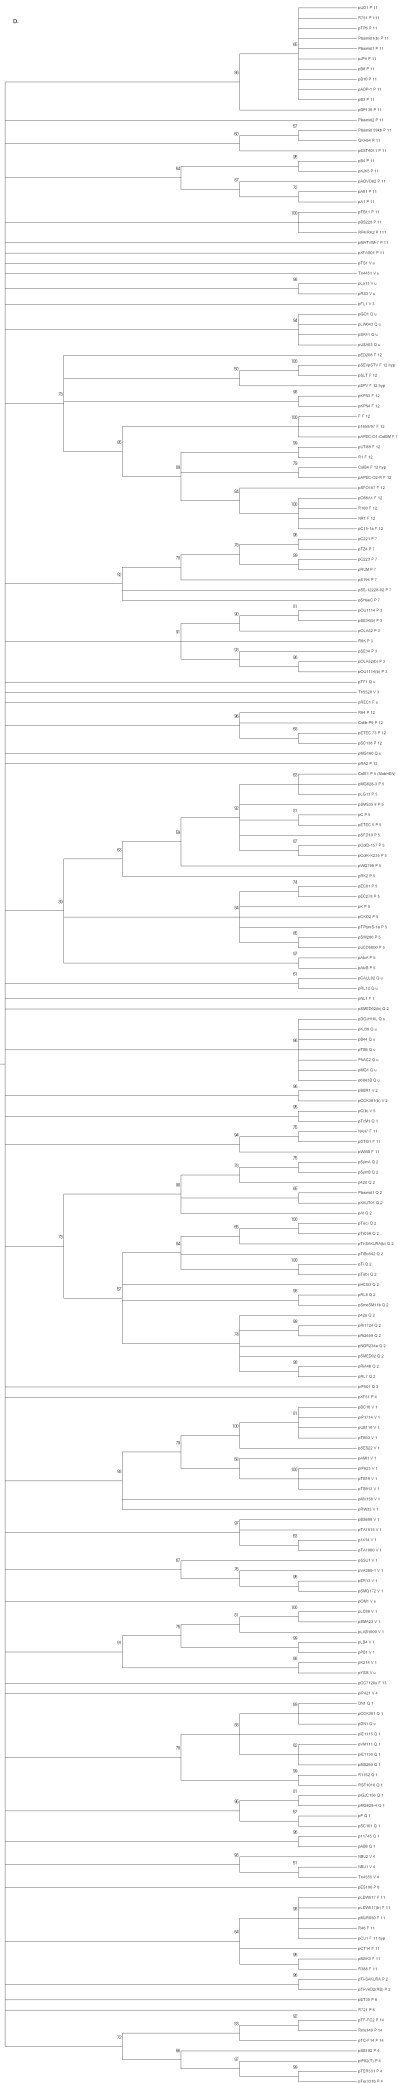







H.

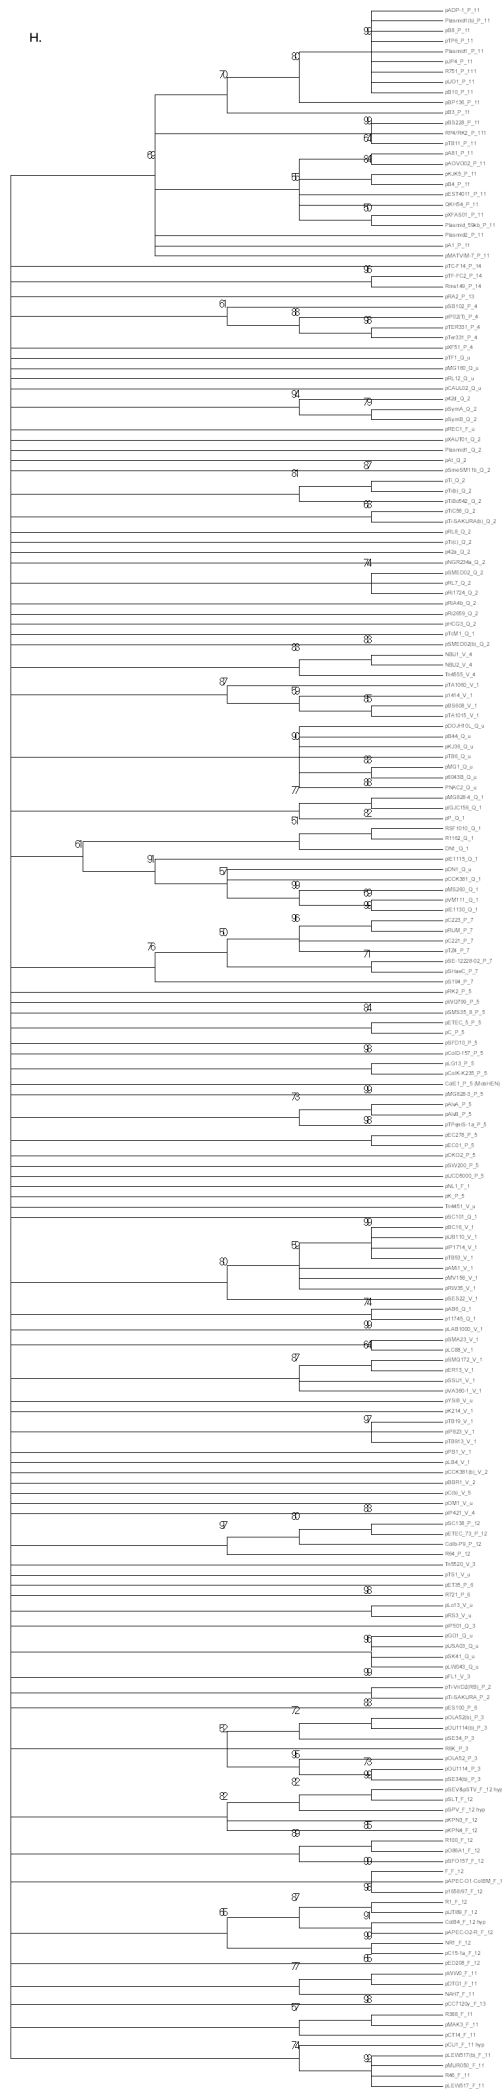

**A. MOB F**

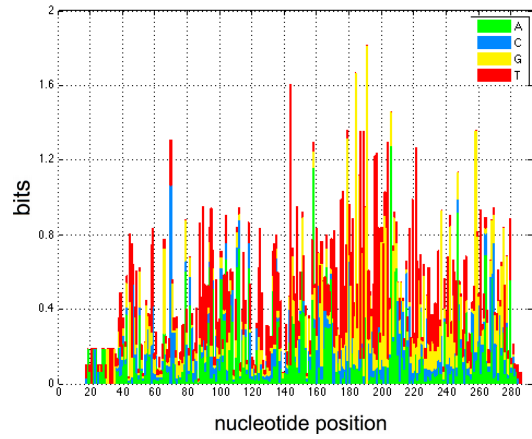

**B. MOB P**

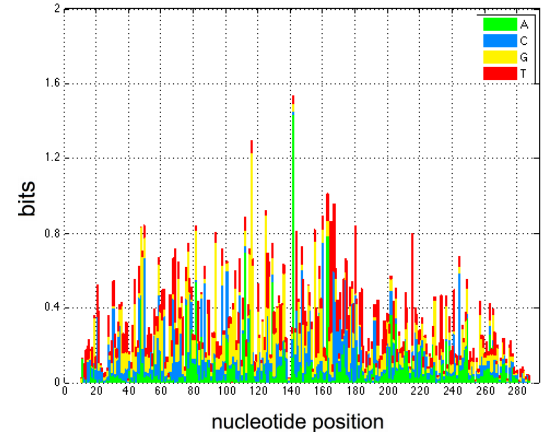

**C. MOB Q**

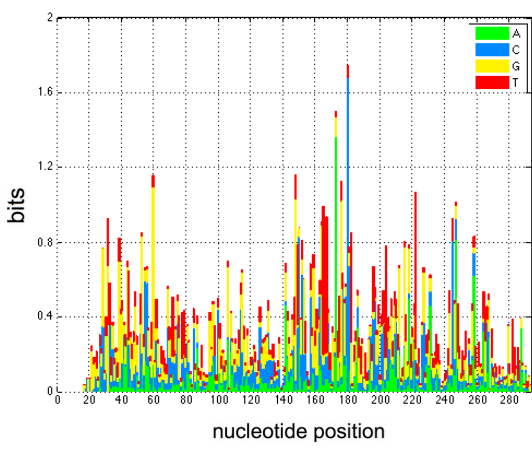

**D. MOB V**

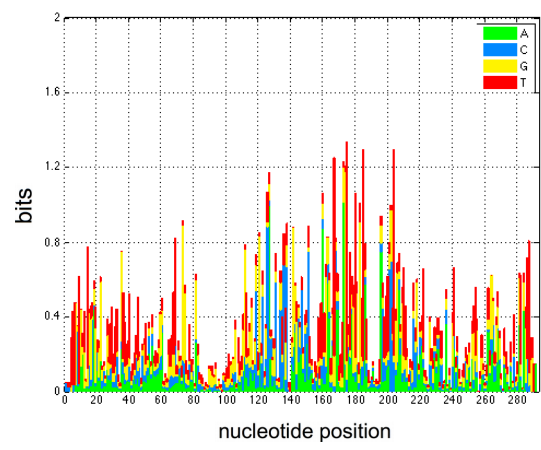

**E. MOB F**

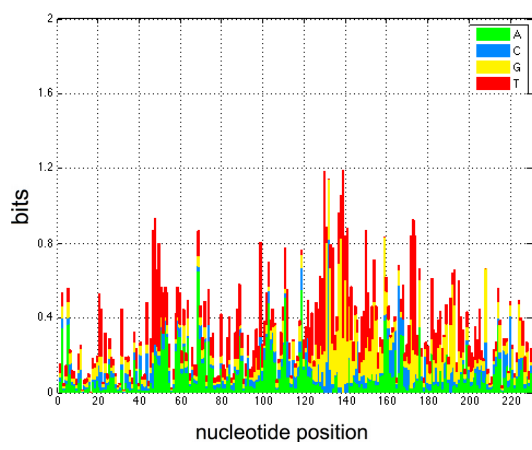

**F. MOB P**

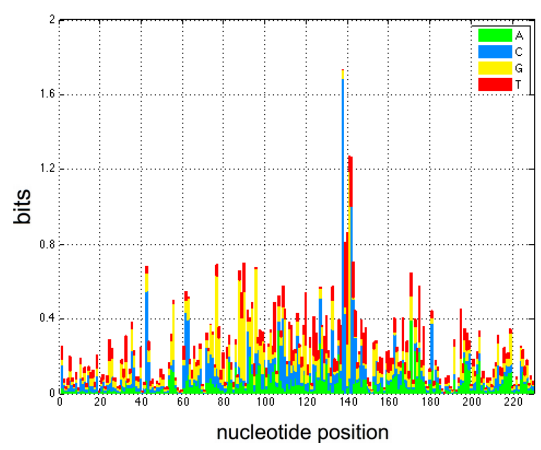

G.

MOB Q

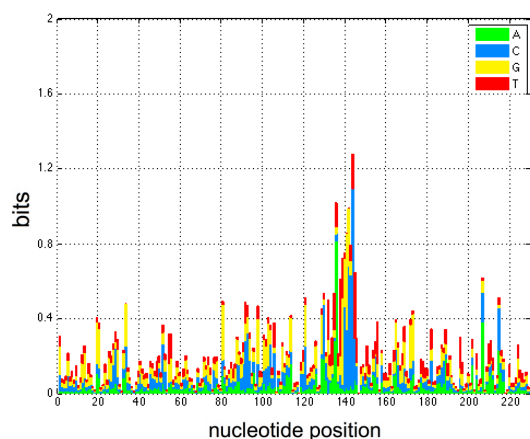

H.

MOB V

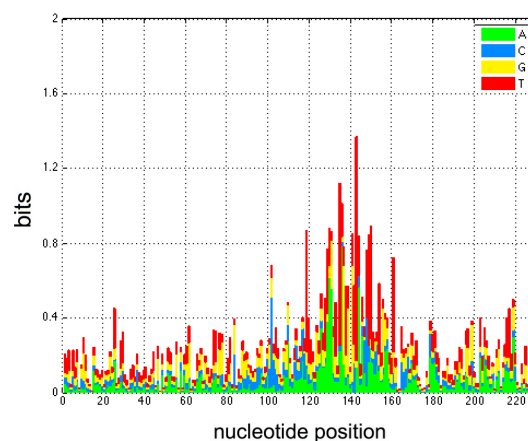

**Figure S3. Sequence conservation of *oriT* regions within each MOB group.** The information content per nucleotide in *oriTs* of MOB F (32 elements), P (77 el.), Q (55 el.) and V (40 el.), is shown for aligned (A-D) and unaligned sequences (E-H). The overall information content for all 200 elements was low, as the average information content per nucleotide was  $0.138 \pm 0.014$  bits and  $0.074 \pm 0.010$  bits (95% confidence bounds given) with aligned and unaligned *oriTs*, respectively. This indicated low sequence conservation of *oriTs*, whereas *oriT* regions of individual MOB groups showed slightly greater sequence conservation. Average information content was (A)  $0.477 \pm 0.041$  bits, (B)  $0.316 \pm 0.028$  bits, (C)  $0.323 \pm 0.031$  bits, (D)  $0.352 \pm 0.032$  bits, (E)  $0.360 \pm 0.032$  bits, (F)  $0.238 \pm 0.029$  bits, (G)  $0.197 \pm 0.024$  bits and (H)  $0.244 \pm 0.028$  bits.

**A.**

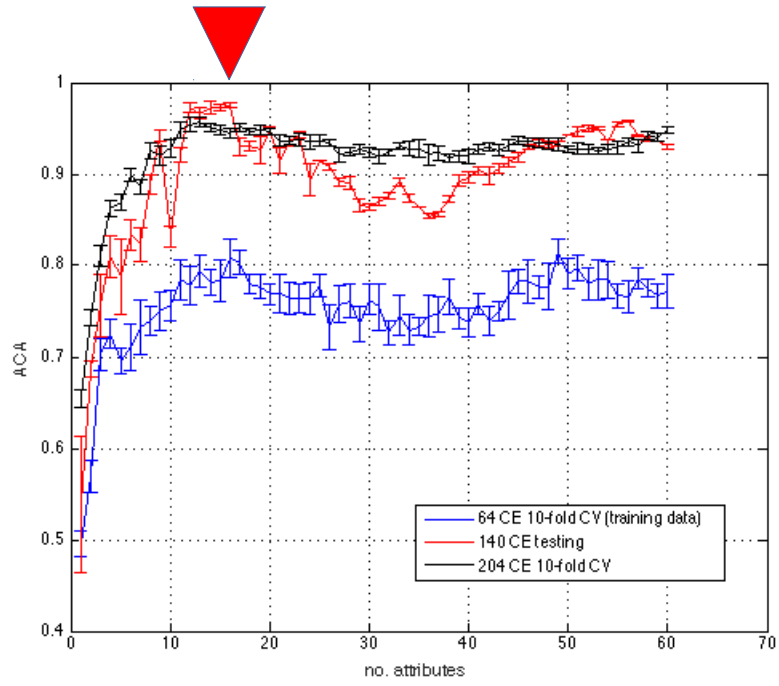

**B.**

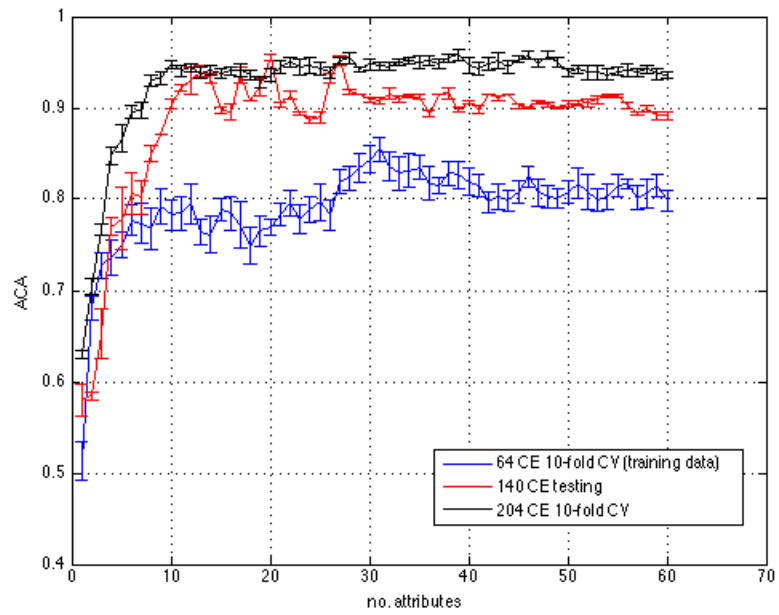



C.

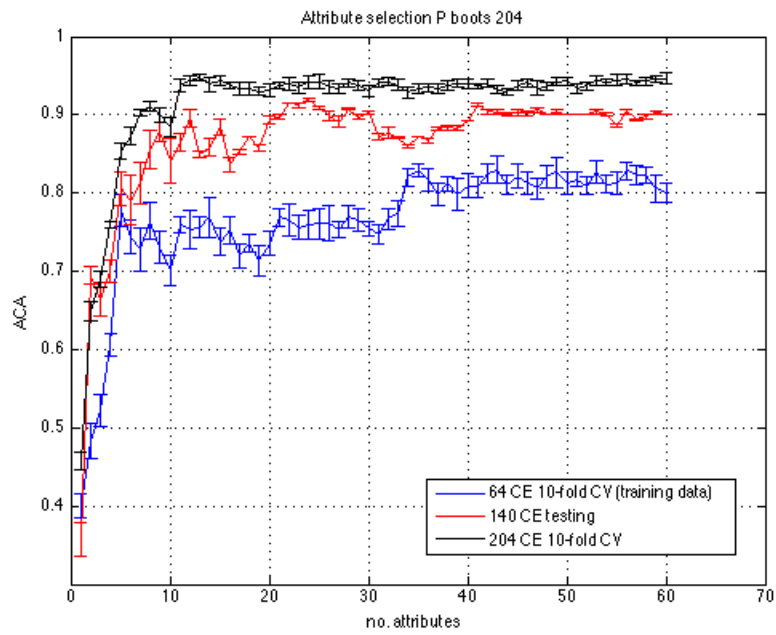

**Figure S4. Evaluation of ranked variables with a backward variable selection procedure.** Variables were ranked using algorithms ReliefF (A) and Csf (B) as well as based on  $P$  values of analysis of variance. Ranked variables were then evaluated with backward variable selection. Shown is the average classification accuracy of 10 repetitions of classification tests. Bars depict 95% confidence bounds. The best subset of 16 variables according to testing with the set of 136 elements is marked with a red arrow in (A).

[Supplementary\\_figure\\_S5.png](#)

**Figure S5. Predicted DNA structural properties in *oriT* regions from four MOB groups.** Shown are mean structural variables according to MOB groups F (blue), P (green), Q (red) and V (cyan) in the set of 200 elements. The subset of 16 highest ranked variables obtained with variable selection is numbered and marked with red circles on the secondary x-axis as well as the following 16 highest ranked variables with green circles (see Supplementary table S4). Significantly conserved positions are specified with blue boxes.

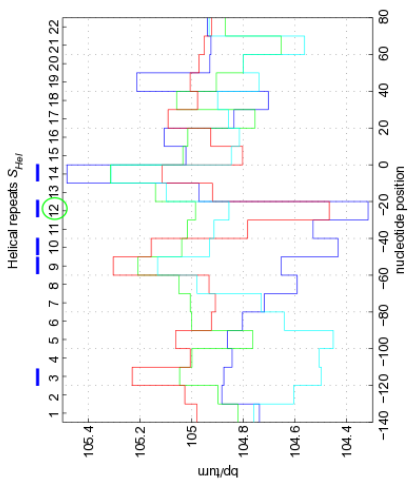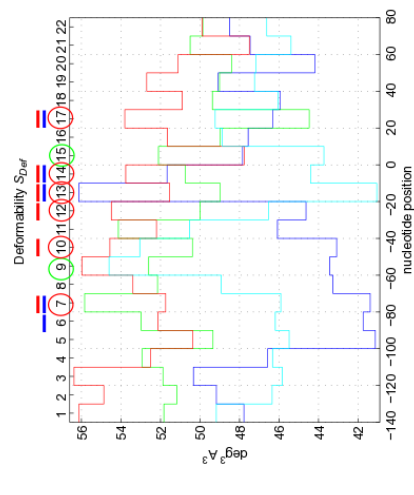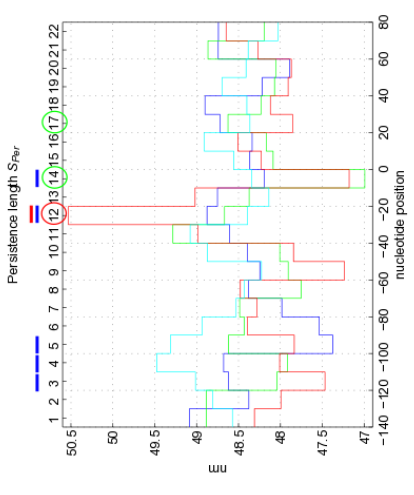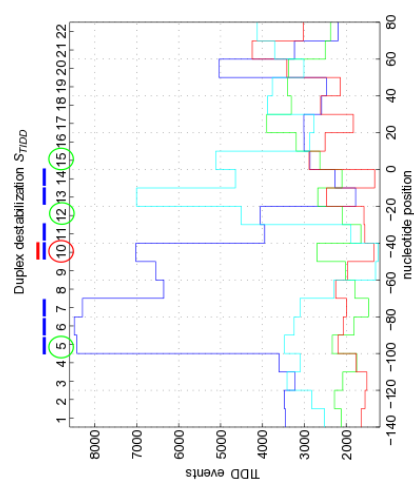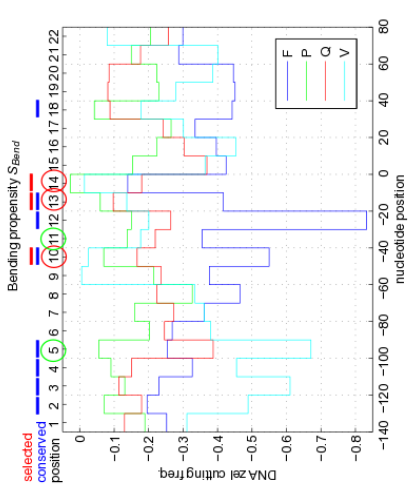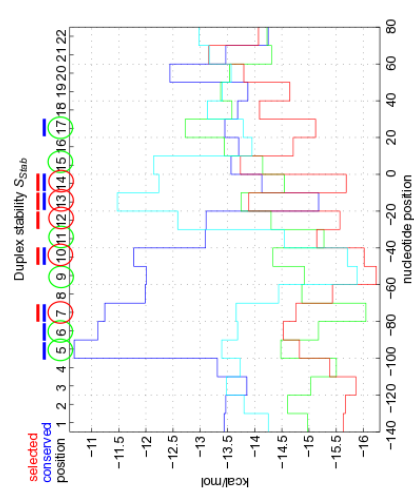

**A.**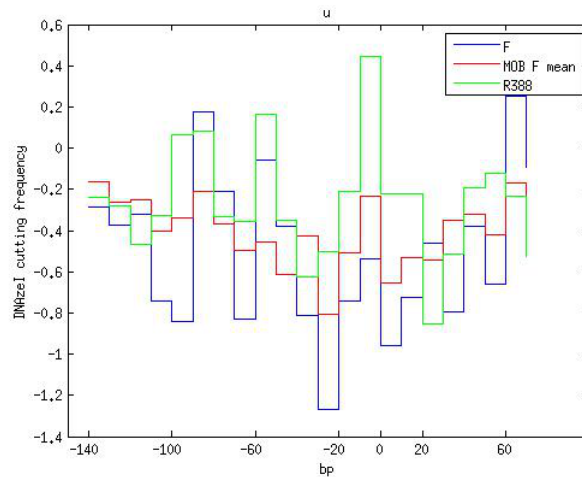**B.**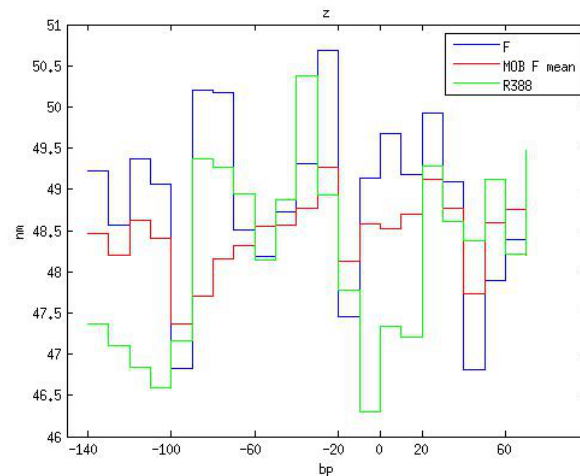**Figure S6. Bending propensity  $S_{Bend}$  and persistence length  $S_{Per}$  of MOB F plasmids.**

Analysis of single plasmids was performed, since the mean bending propensity in MOB F was low despite IHF binding sites in certain MOB F plasmids indicating highly curved regions (e.g. F, R388)<sup>34,35</sup>. (A) bending propensity  $S_{Bend}$  and (B) persistence length  $S_{Per}$  of plasmids F, R388 and mean over all elements in MOB F. Predicted bending propensity  $S_{Bend}$  according to DNaseI cutting frequency shows similar profiles of peaks in F and R388 according to location but differing in amplitude, which correspond to the nicking and protein binding sites (peaks at -20 and 0 bp and -60: IHF binding sites, Fig. 1: *ihfA*; peaks at approx -90 bp: *sbaB* and *sbyA*). This is similar with the peaks in persistence length  $S_{Per}$  at -40 to -20bp and approx. -80 bp.

**A.**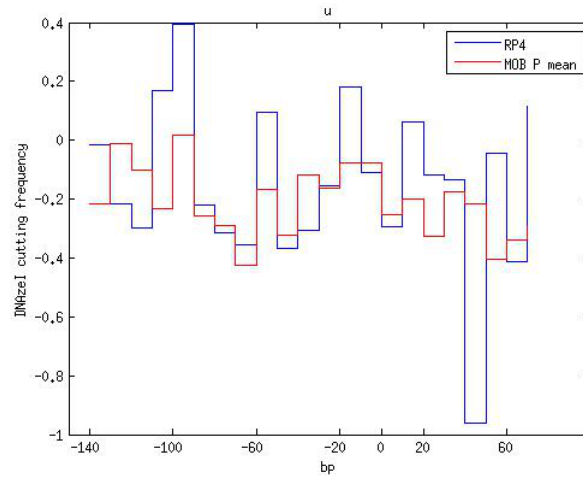**B.**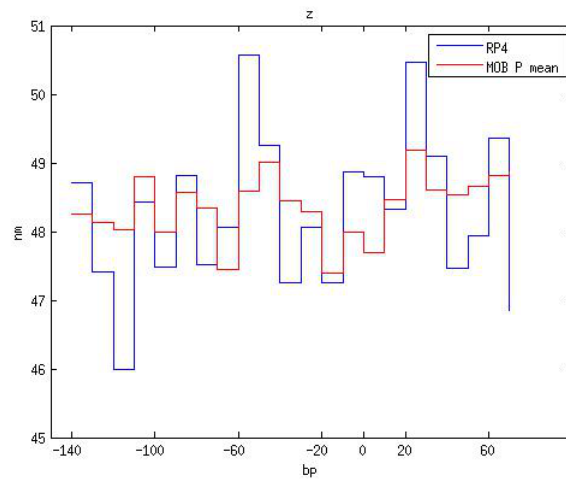

**Figure S7. Bending propensity  $S_{Bend}$  and persistence length  $S_{Per}$  of plasmid RP4 in MOB P.** We analysed if the bending propensity corresponded to intrinsic bends related to the binding site *srk* in plasmid RP4<sup>40</sup>. (A) bending propensity  $S_{Bend}$  and (B) persistence length  $S_{Per}$  of plasmid RP4 and mean over all elements in MOB P. In the upstream region RP4 displays deviations from the mean at multiple concurrent locations in  $S_{Bend}$  and  $S_{Per}$ : approx. 20 bp, 40 bp and 60 bp, which might correspond with the *srk* binding sites (Fig. 1).

## Supplementary tables

**Table S1. Conjugative elements in four mobility (MOB) groups used in the study.** Elements from MOB F, P, Q and V were used to study the conservation of DNA structural properties in *oriT* regions. The following parameters are additionally specified: subgroups (hypothetical are marked with 'hyp'), relaxase enzyme nicking sites *nic* (in the middle of the nucleotide sequences), accession numbers of the elements in the Genbank database, references in the literature for *nic* sites and *oriT* regions.

| Element          | MOB | Subgroup | <i>nic</i> (5'-N5/N5-3') | Genbank   | Reference                                        |
|------------------|-----|----------|--------------------------|-----------|--------------------------------------------------|
| pNL1             | F   | 1        | CGCTGACACC               | NC_002033 | (Guasch et al., 2003)                            |
| R388             | F   | 11       | GCTATAGACA               | BR000038  | (Llosa et al., 1995)                             |
| R46              | F   | 11       | GCTATACACC               | AY046276  | (Coupland et al., 1987)                          |
| pCT14            | F   | 11       | GCTATACACC               | DQ126685  | (Bramucci et al., 2006; Paterson and Iyer, 1997) |
| pWW0             | F   | 11       | TCAATACACA               | NC_003350 | (Greated et al., 2002)                           |
| pCU1             | F   | 11 hyp   | GCTATACACC               | M81668    | (Paterson and Iyer, 1997)                        |
| F                | F   | 12       | GCACCACACC               | NC_002483 | (Matson and Morton, 1991; Reygers et al., 1991)  |
| R1               | F   | 12       | GCACCACACC               | X00783    | (Sut et al., 2009)                               |
| R100             | F   | 12       | CACCACACAC               | NC_002134 | (Abo and Ohtsubo, 1995)                          |
| pED208           | F   | 12       | GTCCCACACC               | AF411480  | (Laurenzio et al., 1991)                         |
| PSEV / pSTV      | F   | 12 hyp   | AGCACCACAC               | AF389528  | (Chu et al., 2002)                               |
| pSPV             | F   | 12 hyp   | AGCACCACAC               | AF389529  | (Chu et al., 2002)                               |
| ColB4            | F   | 12 hyp   | GCACCACACC               | M15134    | (Finlay et al., 1986)                            |
| pCC7120y         | F   | 13       | TTTTCGCACA               | NC_003267 | (Guasch et al., 2003)                            |
| RP4 / RK2        | P   | 11       | CCGGGCAGGA               | X54459    | (Pansegrau et al., 1988)                         |
| R751             | P   | 11       | GCGGGCAGGA               | U67194    | (Pansegrau et al., 1988)                         |
| R64              | P   | 12       | CGGGACAGGA               | NC_005014 | (Furuya et al., 1991)                            |
| pRA2             | P   | 13       | GGGGACAGGG               | NC_005909 | (Rawlings and Tietze, 2001)                      |
| pTF-FC2          | P   | 14       | CAATACAGGA               | M57717    | (Rohrer and Rawlings, 1992)                      |
| pTC-F14          | P   | 14       | TTGAACAGGA               | NC_004734 | (Francia et al., 2004)                           |
| pTi - VirD2 (RB) | P   | 2        | TTTGACAGGA               | AJ237588  | (Tzfira et al., 2004)                            |
| R6K              | P   | 3        | CGATGCAGGA               | X05644    | (Avila et al., 1996)                             |
| pIP02(T)         | P   | 4        | TATTGCAGGA               | NC_003213 | (Tauch et al., 2002)                             |
| pTER331          | P   | 4        | TATTGCAGGA               | NC_010332 | (Mela et al., 2008)                              |
| pXF51            | P   | 4        | TAGGGCAGGA               | NC_002490 | (Tauch et al., 2002)                             |
| pSB102           | P   | 4        | TATTGCAGGA               | NC_003122 | (Tauch et al., 2002)                             |
| ColE1            | P   | 5        | TTAAGCCAGT               | J01566    | (Varsaki et al., 2009)                           |
| R721             | P   | 6        | ACAGGCACGA               | AP002527  | (Dunn et al., 2005)                              |
| pES100           | P   | 6        | ATAGGCACGA               | NC_006842 | (Dunn et al., 2005)                              |
| pC221            | P   | 7        | TTTGGCAAGC               | NC_002129 | (Caryl et al., 2004)                             |
| RSF1010          | Q   | 1        | GAGGGCGCAC               | NC_001740 | (Scherzinger et al., 1992)                       |
| R1162            | Q   | 1        | GAGGGCGCAT               | M13380    | (Bhattacharjee and Meyer, 1991)                  |
| pSC101           | Q   | 1        | AGGGCGCACT               | NC_002056 | (Francia et al., 2004)                           |
| pP               | Q   | 1        | GGATGCGCAC               | NC_003455 | (Francia et al., 2004)                           |
| pAB6             | Q   | 1        | TAATGCCAC                | AF126482  | (Francia et al., 2004)                           |
| pTiC58           | Q   | 2        | AGGGCGCAAT               | AF010180  | (Cook and Farrand, 1992)                         |
| p42a             | Q   | 2        | AAGGGCGCAA               | NC_007762 | (Tun-Garrido et al., 2003)                       |
| pSymA            | Q   | 2        | GAGGGCGCAA               | NC_003037 | (Pérez-Mendoza et al., 2006)                     |
| pSymB            | Q   | 2        | GAGGGCGCAA               | NC_003078 | (Pérez-Mendoza et al., 2006)                     |
| pNGR234a         | Q   | 2        | AAGGGCGCAA               | NC_000914 | (Pérez-Mendoza et al., 2006)                     |
| Plasmid 1        | Q   | 2        | GAGGGCGCAA               | NC_008242 | (Pérez-Mendoza et al., 2006)                     |
| pIP501           | Q   | 3        | AAGGGCGCAC               | L39769    | (Wang and Macrina, 1995)                         |
| pGO1             | Q   | u        | GTAAGGGCGC               | U50629    | (Climo et al., 1996)                             |
| pTF1             | Q   | u        | AGGGCGCACT               | X52699    | (Drolet et al., 1990)                            |
| pMG160           | Q   | u        | ATGGCGCACA               | NC_004527 | (Francia et al., 2004)                           |
| pDN1             | Q   | u        | AGGGCGCACT               | NC_002636 | (Rawlings and Tietze, 2001)                      |
| pKJ36            | Q   | u        | TAGGGCGCAC               | NC_002635 | (Francia et al., 2004)                           |
| pMV158           | V   | 1        | ATAACACACT               | NC_010096 | (Farias and Espinosa, 2000)                      |
| pLAB1000         | V   | 1        | TATAACCCAC               | M55222    | (Smith and Parker, 1998)                         |
| pTA1060          | V   | 1        | TGTAACGCAC               | NC_001766 | (Smith and Parker, 1998)                         |
| pVA380-1         | V   | 1        | TGTAACGTAC               | L23803    | (Smith and Parker, 1998)                         |
| pIP823           | V   | 1        | TATAGCACAC               | U40997    | (Smith and Parker, 1998)                         |
| pIP1714          | V   | 1        | ATAACACACT               | AF015628  | (Francia et al., 2004)                           |
| pBBR1            | V   | 2        | GTATACTCAC               | X66730    | (Szpirer et al., 2001)                           |
| pFL1             | V   | 3        | TCTAGTGTTT               | NC_002132 | (Francia et al., 2004)                           |
| Tn5520           | V   | 3        | CGTAGCTTAT               | AF038866  | (Vedantam et al., 2006)                          |
| pIP421           | V   | 4        | TATAGCACAC               | Y10480    | (Vedantam et al., 2006)                          |
| NBU1             | V   | 4        | TATAGCCCAC               | NC_006373 | (Vedantam et al., 2006)                          |
| Tn4555           | V   | 4        | TATAGCCCAC               | U75371    | (Vedantam et al., 2006)                          |
| NBU2             | V   | 4        | TATAGCCCAC               | AF251288  | (Wang et al., 2000)                              |
| pLo13            | V   | u        | ACTAACTTGC               | M95954    | (Vedantam et al., 2006)                          |
| pTS1             | V   | u        | GTGTACTTAC               | NC_002650 | (Francia et al., 2004)                           |
| pOM1             | V   | u        | TCTAACTCAC               | L31579    | (Francia et al., 2004)                           |
| Tn4451           | V   | u        | TGTAACCCAC               | U15027    | (Vedantam et al., 2006)                          |

**Table S2. Conjugative elements in four mobility (MOB) groups used in the study – testing dataset.**  
 The following parameters are specified: subgroups, relaxase enzyme nicking sites *nic* (in the middle of the nucleotide sequences), accession numbers of the elements in the Genbank database, position of *oriT* in the

| Element        | MOB | Subgroup | <i>nic</i> (5'-NS-3') | Genbank   | Position |
|----------------|-----|----------|-----------------------|-----------|----------|
| pMAK3          | F   | 11       | GCTATAGACA            | NC_009882 | 16180    |
| pLEW517        | F   | 11       | GCTATACACC            | NC_009132 | 61233    |
| pMUR050        | F   | 11       | GCTATACACC            | NC_007682 | 46883    |
| pAPEC-O2-R     | F   | 12       | GCACCACACC            | NC_006671 | 39750    |
| pREC1          | F   | u        | GGTGGCAAGG            | NC_007486 | 45160    |
| pLEW517        | F   | 11       | GCTATACACC            | NC_009132 | 3131     |
| pDTG1          | F   | 11       | TCATACACA             | NC_004999 | 64075    |
| NAH7           | F   | 11       | TCATACACA             | NC_007926 | 19974    |
| NR1            | F   | 12       | GCACCACACA            | NC_009133 | 50565    |
| pC15-1a        | F   | 12       | GCACCACACA            | NC_005327 | 50514    |
| p036A1         | F   | 12       | CACCACACAC            | NC_008460 | 64944    |
| p1658/97       | F   | 12       | GCACCACACC            | NC_004998 | 2141     |
| pSFO157        | F   | 12       | CACCACACCC            | NC_009602 | 88570    |
| pSLT           | F   | 12       | AGCACACAC             | NC_003277 | 60689    |
| pUT189         | F   | 12       | GCACCACACA            | NC_007941 | 77483    |
| pAPEC-O1-CoBIM | F   | 12       | GCACCACACC            | NC_009837 | 18133    |
| pKPN3          | F   | 12       | ATGACCACAC            | NC_009649 | 140428   |
| pKPN4          | F   | 12       | ATGACCACAC            | NC_009650 | 72313    |
| pTB11          | P   | 11       | CGGGCAGGA             | NC_006352 | 55494    |
| pBSZ28         | P   | 11       | CGGGCAGGA             | NC_008357 | 80287    |
| pKJ65          | P   | 11       | CGGGCAGGA             | NC_008272 | 44910    |
| pB3            | P   | 11       | CGGGCAGGA             | NC_006388 | 45893    |
| pA81           | P   | 11       | CGGGCAGGA             | NC_006830 | 68723    |
| pA1            | P   | 11       | CGGGCAGGA             | NC_007353 | 16808    |
| pB4            | P   | 11       | CGGGCAGGA             | NC_003430 | 72110    |
| pUO1           | P   | 11       | CGGGCAGGA             | NC_005088 | 56631    |
| pB10           | P   | 11       | CGGGCAGGA             | NC_004840 | 31393    |
| pJP4           | P   | 11       | CGGGCAGGA             | NC_005912 | 85849    |
| Plasmid 1      | P   | 11       | CGGGCAGGA             | NC_007337 | 85849    |
| pTP6           | P   | 11       | CGGGCAGGA             | NC_007680 | 52506    |
| pB6            | P   | 11       | CGGGCAGGA             | NC_007502 | 48176    |
| Plasmid 2      | P   | 11       | CGGGCAGGA             | NC_006824 | 58532    |
| pMATVIM-7      | P   | 11       | GAGGGCAGGA            | NC_009739 | 22312    |
| pEST4011       | P   | 11       | CGGGCAGGA             | NC_005793 | 74414    |
| pBP136         | P   | 11       | CGGGCAGGA             | NC_008459 | 39464    |
| pXFAS01        | P   | 11       | CGGGCAGGA             | NC_010579 | 29923    |
| OKH54          | P   | 11       | CGGGCAGGA             | NC_008055 | 68272    |
| Plasmid_59kb   | P   | 11       | CAGGGCAGGA            | NC_009704 | 50562    |
| pSC138         | P   | 12       | CGGGCAGGA             | NC_006856 | 81174    |
| pETEC_73       | P   | 12       | CGGGCAGGA             | NC_009788 | 58887    |
| Rms149         | P   | 14       | CTTACAGGCA            | NC_007100 | 33045    |
| pC223          | P   | 7        | TTTGGCAAGC            | NC_005243 | 1869     |
| pSE-12228-02   | P   | 7        | TTTGGCAAGC            | NC_005007 | 3103     |
| pRUM           | P   | 7        | TTTGGCAAGC            | NC_005000 | 18333    |
| pSHacC         | P   | 7        | TTTGGCAAGC            | NC_007171 | 5814     |
| pS194          | P   | 7        | TTTGGCAAGC            | NC_005564 | 951      |
| pET35          | P   | 6        | CCGAGCACAG            | NC_010696 | 26846    |
| pTZ4           | P   | 7        | TTTGGCAAGC            | NC_010111 | 3150     |
| pOLA52         | P   | 3        | GCAGGATAGG            | NC_010378 | 30784    |
| pOU1114        | P   | 3        | GCAGGATAGG            | NC_010421 | 23882    |
| pETEC_5        | P   | 5        | CTAAGCCAGT            | NC_009791 | 218      |
| pSMS5_8        | P   | 5        | CTAAGCCAGT            | NC_010485 | 2928     |
| pTPqnrS-1a     | P   | 5        | TTAAGCCAGT            | NC_009807 | 3493     |
| pAlvA          | P   | 5        | TTAAGCCAGT            | NC_005910 | 4093     |
| pAV6           | P   | 5        | TTAAGCCAGT            | NC_005911 | 4185     |
| pAVO2          | P   | 11       | CGGGCAGGA             | NC_008488 | 642      |
| pADP-1         | P   | 11       | CGGGCAGGA             | NC_004956 | 11997    |
| Plasmid 1      | P   | 11       | CGGGCAGGA             | NC_007337 | 14719    |
| Colib-P9       | P   | 12       | CGGGCAGGA             | NC_002122 | 39635    |
| pTI-SAKURA     | P   | 2        | TTTGGCAAGC            | NC_002147 | 197028   |
| pT821          | P   | 4        | TATTGCAAGG            | NC_010332 | 10787    |
| pSE34          | P   | 3        | GCAGGATAGG            | EU219533  | 3483     |
| pC             | P   | 5        | TTAAGCCAGT            | NC_003457 | 774      |
| pLG13          | P   | 5        | TTAAGCCAGT            | NC_005019 | 860      |
| pWQ799         | P   | 5        | ATAGCCAGT             | L39794    | 921      |
| pMS225         | P   | 5        | TTAAGCCAGT            | NC_008488 | 642      |
| pSFD10         | P   | 5        | TTAAGCCAGT            | NC_003079 | 1017     |
| pRK2           | P   | 5        | TGCCACATA             | NC_005970 | 1158     |
| pColD-157      | P   | 5        | TTAAGCCAGT            | Y10412    | 3494     |
| pCoK-K235      | P   | 5        | TTAAGCCAGT            | NC_006881 | 5477     |
| pK             | P   | 5        | GTAGCCAGT             | NC_003456 | 719      |
| pCKO2          | P   | 5        | TAGTAAGCCA            | NC_009794 | 5457     |
| pEC278         | P   | 5        | TTAAGCCAGT            | AY589571  | 824      |
| pSW200         | P   | 5        | TTAAGCCAGT            | L42525    | 1175     |
| pUCD5000       | P   | 5        | AGAGCCAGT             | NC_001898 | 1502     |
| pEC01          | P   | 5        | GTAGCCAGT             | AB117929  | 162      |
| pTm1           | Q   | 1        | CAGCCTCCGC            | EU421841  | 25051    |
| pMG828-4       | Q   | 1        | GGAAGCCAC             | NC_008489 | 5418     |
| pDOJH10L       | Q   | u        | TAGGGCCGAC            | NC_004252 | 7384     |
| pRL2           | Q   | u        | ATGCGGTTA             | NC_008378 | 303172   |
| pB4            | Q   | u        | TAGGGCCGAC            | NC_004443 | 3501     |
| pMG1           | Q   | u        | TAGGGCCGAC            | NC_006997 | 3566     |
| pSK41          | Q   | u        | GTAAGGCCG             | NC_005024 | 10221    |
| pLW043         | Q   | u        | GTAAGGCCG             | NC_005054 | 55006    |
| pTB6           | Q   | u        | TAGGGCCGAC            | NC_006843 | 3503     |
| pS203          | Q   | u        | GTAAGGCCG             | NC_007752 | 34253    |
| pSMED02        | Q   | 2        | AGGGCCCAA             | NC_009621 | 359992   |
| pMS260         | Q   | 1        | AGGGCCCACT            | NC_005312 | 3957     |
| pVM111         | Q   | 1        | AGGGCCCACT            | AJ514834  | 5916     |
| pIE1130        | Q   | 1        | AGGGCCCACT            | NC_004973 | 620      |
| pIE115         | Q   | 1        | GAGGGCCGAC            | NC_002524 | 377      |
| pCCK381        | Q   | 1        | AGGGCCCACT            | NC_006994 | 869      |
| DN1            | Q   | 1        | GAGGGCCGAC            | NC_002636 | 861      |
| pCAUL02        | Q   | u        | CAGCGGCTGG            | NC_010333 | 82716    |
| p1745          | Q   | 1        | TAGTCCGAC             | DQ178855  | 757      |
| pISCI156       | Q   | 1        | GAGGGCCGAC            | NC_009781 | 2658     |
| PNAC2          | Q   | u        | TAGGGCCGAC            | NC_004789 | 1085     |
| p6043B         | Q   | u        | TAGGGCCGAC            | DQ458811  | 195      |
| pRL8           | Q   | 2        | AGGGCCCAAT            | NC_008383 | 126432   |
| pZd            | Q   | 2        | GAGGGCCCAA            | NC_004041 | 182616   |
| p41            | Q   | 2        | GAGGGCCCAA            | NC_003094 | 118196   |
| pRi2659        | Q   | 2        | AGGGCCCAA             | EU186381  | 106649   |
| pRi1724        | Q   | 2        | AGGGCCCAA             | NC_002575 | 140060   |
| pXAUT01        | Q   | 2        | GAGGGCCCAA            | NC_009717 | 220687   |
| pRA4b          | Q   | 2        | AGGGCCCAA             | AB050904  | 9994     |
| pRL7           | Q   | 2        | AGGGCCCAA             | NC_008382 | 69454    |
| pTBo542        | Q   | 2        | AGGGTCCAAG            | DQ058764  | 213656   |
| pSmeSM11b      | Q   | 2        | AGGGGCCAAT            | EF066650  | 157471   |
| pTI-SAKURA     | Q   | 2        | AGGGGCCAAT            | NC_002147 | 100335   |
| pHC03          | Q   | 2        | GGGGCCAGTA            | NC_005873 | 110160   |
| pTi            | Q   | 2        | AGGGGCCAAT            | DQ195264  | 1760     |
| pTi            | Q   | 2        | AGGGGCCAAT            | DQ195264  | 30727    |
| pTi            | Q   | 2        | GGGGCCAATT            | DQ195264  | 143879   |
| pSSU1          | V   | 1        | TATAAATA              | NC_002140 | 2429     |
| pSMQ172        | V   | 1        | TATAAATA              | AF295100  | 1359     |
| pER13          | V   | 1        | GTATAACGAC            | NC_002276 | 1864     |
| pPB1           | V   | 1        | TATAAACCAC            | NC_006399 | 1660     |
| pLB4           | V   | 1        | TATAAACCAC            | M33531    | 526      |
| pYS18          | V   | u        | TATAAACCAC            | EU185047  | 3630     |
| pSMA23         | V   | 1        | TATAGCCCAA            | NC_010242 | 545      |
| pLC8           | V   | 1        | TATAGCCCAA            | U51533    | 2075     |
| pBS608         | V   | 1        | TGTAACGAC             | NC_006825 | 3563     |
| pTA1015        | V   | 1        | TGTAACGAC             | NC_001765 | 2772     |
| p1414          | V   | 1        | TGTAACGAC             | NC_002075 | 4365     |
| pSES22         | V   | 1        | ATAGCACT              | NC_007621 | 2572     |
| pTB19          | V   | 1        | TATAGCAC              | M63891    | 9895     |
| pTB53          | V   | 1        | ATAACACT              | D14852    | 424      |
| pTB913         | V   | 1        | TATAGCAC              | M63891    | 9895     |
| pRS3           | V   | u        | ACTAATTTCG            | NC_003099 | 141      |
| pRW35          | V   | 1        | ATAACACTA             | EU192194  | 4551     |
| p4Mhphs1       | V   | 1        | ATAACACT              | NC_005013 | 8466     |
| pK214          | V   | 1        | TATAAACCAC            | X92946    | 21706    |
| pBC16          | V   | 1        | ATAACACT              | NC_001705 | 1155     |
| pUB110         | V   | 1        | ATAACACT              | NC_001384 | 1155     |
| pCCK381        | V   | 2        | GTGACTCAC             | NC_006994 | 5223     |
| pC             | V   | 5        | CGGAAGGCGG            | NC_007489 | 8896     |



**Table S3. P values of pairwise F test (f test) between MOB groups.**

|       | MOB P   | MOB Q | MOB V   |
|-------|---------|-------|---------|
| MOB F | < 0.001 | 0,050 | < 0.001 |
| MOB P |         | 0,006 | < 0.001 |
| MOB Q |         |       | < 0.001 |

Table S4. Ranking of structural variables using machine learning algorithms. Variables were ranked according to relative importance based on 10 repetitions of 10-fold cross validations using CSE and ReliefF algorithms.

| Ranking | CSE algorithm           |       |              |               | ReliefF algorithm |         |              |               |
|---------|-------------------------|-------|--------------|---------------|-------------------|---------|--------------|---------------|
|         | Average number of tests | STD   | Variable no. | Variable name | Average merit     | STD     | Variable no. | Variable name |
| 1       | 10                      | 0.000 | 123          | S_Def_13      | 0.188             | .000422 | 123          | S_Def_13      |
| 2       | 10                      | 0.000 | 79           | S_Stab_13     | 0.163             | .000000 | 76           | S_Stab_10     |
| 3       | 10                      | 0.000 | 34           | S_Per_12      | 0.155             | .000527 | 80           | S_Stab_14     |
| 4       | 10                      | 0.000 | 14           | S_Bend_14     | 0.152             | .000316 | 14           | S_Bend_14     |
| 5       | 9.7                     | 0.516 | 80           | S_Stab_14     | 0.151             | .000000 | 124          | S_Def_14      |
| 6       | 9.7                     | 0.483 | 101          | S_TIDD_13     | 0.139             | .000516 | 98           | S_TIDD_10     |
| 7       | 9.7                     | 0.675 | 36           | S_Per_14      | 0.138             | .000422 | 122          | S_Def_12      |
| 8       | 9.6                     | 0.516 | 127          | S_Def_17      | 0.135             | .000483 | 117          | S_Def_7       |
| 9       | 9.6                     | 0.699 | 76           | S_Stab_10     | 0.133             | .000000 | 120          | S_Def_10      |
| 10      | 8.6                     | 0.966 | 102          | S_TIDD_14     | 0.130             | .000316 | 10           | S_Bend_10     |
| 11      | 8.4                     | 0.843 | 122          | S_Def_12      | 0.130             | .000316 | 94           | S_Per_12      |
| 12      | 8.2                     | 0.632 | 73           | S_Stab_7      | 0.127             | .000422 | 79           | S_Stab_13     |
| 13      | 6.9                     | 0.994 | 98           | S_TIDD_10     | 0.127             | .000516 | 13           | S_Bend_13     |
| 14      | 6.8                     | 0.919 | 103          | S_TIDD_15     | 0.122             | .000422 | 73           | S_Stab_7      |
| 15      | 6.4                     | 0.966 | 5            | S_Bend_5      | 0.122             | .000471 | 78           | S_Stab_12     |
| 16      | 6.2                     | 2.201 | 124          | S_Def_14      | 0.120             | .000000 | 127          | S_Def_17      |
| 17      | 6.1                     | 1.197 | 118          | S_Def_5       | 0.119             | .000483 | 56           | S_Hel_12      |
| 18      | 5.3                     | 1.337 | 46           | S_Hel_2       | 0.111             | .000422 | 75           | S_Stab_9      |
| 19      | 5.2                     | 2.098 | 58           | S_Hel_14      | 0.107             | .000483 | 71           | S_Stab_5      |
| 20      | 4.8                     | 1.687 | 105          | S_TIDD_17     | 0.106             | .000483 | 36           | S_Per_14      |
| 21      | 4.3                     | 1.160 | 2            | S_Bend_2      | 0.104             | .000483 | 125          | S_Def_15      |
| 22      | 4.2                     | 1.317 | 72           | S_Stab_7      | 0.102             | .000316 | 72           | S_Stab_6      |
| 23      | 4                       | 1.333 | 74           | S_Stab_8      | 0.099             | .000483 | 61           | S_Stab_15     |
| 24      | 3.9                     | 1.729 | 120          | S_Def_10      | 0.099             | .000516 | 119          | S_Def_9       |
| 25      | 3.9                     | 1.524 | 83           | S_Stab_17     | 0.097             | .000516 | 5            | S_Bend_5      |
| 26      | 3.9                     | 1.197 | 63           | S_Hel_19      | 0.096             | .000000 | 83           | S_Stab_17     |
| 27      | 3.8                     | 1.033 | 96           | S_TIDD_8      | 0.096             | .000000 | 39           | S_Per_17      |
| 28      | 3.7                     | 1.160 | 93           | S_TIDD_5      | 0.095             | .000568 | 93           | TIDD_5        |
| 29      | 3.5                     | 0.707 | 24           | S_Per_2       | 0.095             | .000471 | 11           | S_Bend_11     |
| 30      | 3.4                     | 1.430 | 107          | S_TIDD_19     | 0.095             | .000675 | 103          | S_TIDD_15     |
| 31      | 3                       | 1.155 | 71           | S_Stab_5      | 0.094             | .000516 | 77           | S_Stab_11     |
| 32      | 2.7                     | 1.889 | 85           | S_Stab_19     | 0.093             | .000471 | 100          | S_TIDD_12     |
| 33      | 2.7                     | 0.675 | 53           | S_Hel_5       | 0.093             | .000000 | 101          | S_TIDD_13     |
| 34      | 2.6                     | 1.265 | 28           | S_Per_6       | 0.090             | .000316 | 61           | S_Hel_17      |
| 35      | 2.6                     | 1.265 | 10           | S_Bend_10     | 0.089             | .000516 | 52           | S_Hel_8       |
| 36      | 2.5                     | 1.080 | 56           | S_Hel_12      | 0.089             | .000527 | 57           | S_Hel_13      |
| 37      | 2.5                     | 0.850 | 25           | S_Per_3       | 0.086             | .000000 | 116          | S_Def_6       |
| 38      | 2.4                     | 1.075 | 125          | S_Def_15      | 0.086             | .000000 | 54           | S_Hel_10      |
| 39      | 2.285                   | 48    | S_Hel_4      | 0.086         | .000000           | 8       | S_Bend_8     |               |
| 40      | 2.2                     | 0.632 | 99           | S_TIDD_11     | 0.086             | .000516 | 55           | S_Hel_11      |
| 41      | 2.2                     | 1.033 | 94           | S_TIDD_6      | 0.085             | .000000 | 74           | S_Stab_8      |
| 42      | 2                       | 0.816 | 78           | S_Stab_12     | 0.084             | .000000 | 113          | S_Def_3       |
| 43      | 1.8                     | 0.919 | 109          | S_TIDD_21     | 0.084             | .000516 | 118          | S_Def_8       |
| 44      | 1.7                     | 0.823 | 67           | S_Stab_1      | 0.084             | .000527 | 51           | S_Hel_7       |
| 45      | 1.7                     | 1.059 | 30           | S_Per_5       | 0.083             | .000316 | 61           | S_Hel_21      |
| 46      | 1.5                     | 1.179 | 100          | S_TIDD_12     | 0.083             | .000316 | 50           | S_Hel_6       |
| 47      | 1.3                     | 0.675 | 27           | S_Per_5       | 0.083             | .000000 | 12           | S_Bend_12     |
| 48      | 1.2                     | 0.789 | 47           | S_Hel_3       | 0.082             | .000568 | 95           | S_TIDD_7      |
| 49      | 1.1                     | 0.738 | 106          | S_TIDD_18     | 0.081             | .000699 | 33           | S_Per_11      |
| 50      | 1                       | 1.197 | 32           | S_Per_10      | 0.080             | .000000 | 94           | S_TIDD_6      |
| 51      | 1                       | 1.054 | 65           | S_Hel_21      | 0.080             | .000000 | 82           | S_Stab_16     |
| 52      | 1                       | 1.054 | 52           | S_Hel_8       | 0.079             | .000000 | 69           | S_Stab_3      |
| 53      | 1                       | 0.943 | 16           | S_Bend_16     | 0.078             | .000316 | 27           | S_Per_5       |
| 54      | 1                       | 0.816 | 13           | S_Bend_13     | 0.077             | .000675 | 19           | S_Bend_19     |
| 55      | 0.9                     | 0.738 | 110          | S_TIDD_22     | 0.077             | .000316 | 31           | S_Per_9       |
| 56      | 0.9                     | 0.878 | 40           | S_Per_8       | 0.076             | .000316 | 25           | S_Per_19      |
| 57      | 0.7                     | 0.823 | 130          | S_Def_20      | 0.075             | .000316 | 47           | S_Hel_3       |
| 58      | 0.6                     | 0.516 | 112          | S_Def_2       | 0.074             | .000422 | 18           | S_Bend_18     |
| 59      | 0.6                     | 1.075 | 88           | S_Stab_22     | 0.073             | .000316 | 63           | S_Hel_19      |
| 60      | 0.6                     | 0.843 | 42           | S_Per_20      | 0.073             | .000568 | 6            | S_Bend_6      |
| 61      | 0.6                     | 0.699 | 20           | S_Bend_20     | 0.072             | .000422 | 20           | S_Per_10      |
| 62      | 0.5                     | 0.707 | 89           | S_TIDD_1      | 0.072             | .000000 | 70           | S_Stab_4      |
| 63      | 0.5                     | 0.527 | 82           | S_Stab_16     | 0.072             | .000483 | 130          | S_Def_20      |
| 64      | 0.4                     | 0.516 | 81           | S_Stab_15     | 0.071             | .000000 | 97           | S_TIDD_9      |
| 65      | 0.4                     | 0.516 | 55           | S_Hel_11      | 0.071             | .000316 | 115          | S_Def_5       |
| 66      | 0.4                     | 0.516 | 39           | S_Per_17      | 0.071             | .000316 | 3            | S_Bend_3      |
| 67      | 0.4                     | 0.516 | 35           | S_Per_13      | 0.071             | .000483 | 29           | S_Per_7       |
| 68      | 0.4                     | 0.516 | 7            | S_Bend_7      | 0.070             | .000516 | 99           | S_TIDD_11     |
| 69      | 0.3                     | 0.675 | 95           | S_TIDD_7      | 0.070             | .000949 | 28           | S_Per_6       |
| 70      | 0.3                     | 0.483 | 90           | S_TIDD_2      | 0.070             | .000000 | 91           | S_TIDD_3      |
| 71      | 0.3                     | 0.483 | 26           | S_Per_4       | 0.070             | .000422 | 58           | S_Hel_14      |
| 72      | 0.3                     | 0.483 | 9            | S_Bend_9      | 0.069             | .000516 | 104          | S_TIDD_16     |
| 73      | 0.3                     | 0.483 | 4            | S_Bend_4      | 0.067             | .000527 | 102          | S_TIDD_14     |
| 74      | 0.3                     | 0.483 | 1            | S_Bend_1      | 0.066             | .000422 | 132          | S_Def_22      |
| 75      | 0.2                     | 0.632 | 128          | S_Def_18      | 0.066             | .000527 | 126          | S_Def_16      |
| 76      | 0.2                     | 0.422 | 117          | S_Def_7       | 0.064             | .000422 | 49           | S_Hel_5       |
| 77      | 0.2                     | 0.422 | 68           | S_Stab_2      | 0.064             | .000632 | 121          | S_Def_11      |
| 78      | 0.2                     | 0.422 | 60           | S_Hel_16      | 0.063             | .000568 | 20           | S_Bend_20     |
| 79      | 0.2                     | 0.422 | 54           | S_Hel_10      | 0.062             | .000000 | 53           | S_Hel_9       |
| 80      | 0.2                     | 0.422 | 21           | S_Bend_21     | 0.062             | .000471 | 7            | S_Bend_7      |
| 81      | 0.2                     | 0.422 | 3            | S_Bend_3      | 0.062             | .000527 | 30           | S_Per_8       |
| 82      | 0.1                     | 0.316 | 126          | S_Def_16      | 0.061             | .000422 | 9            | S_Bend_9      |
| 83      | 0.1                     | 0.316 | 61           | S_Hel_17      | 0.061             | .000000 | 114          | S_Def_4       |
| 84      | 0                       | 0.000 | 132          | S_Def_22      | 0.061             | .000316 | 65           | S_Stab_2      |
| 85      | 0                       | 0.000 | 131          | S_Def_21      | 0.061             | .000422 | 88           | S_Stab_22     |
| 86      | 0                       | 0.000 | 129          | S_Def_19      | 0.060             | .000516 | 112          | S_Def_2       |
| 87      | 0                       | 0.000 | 121          | S_Def_11      | 0.059             | .000483 | 86           | S_Stab_20     |
| 88      | 0                       | 0.000 | 119          | S_Def_9       | 0.059             | .000316 | 96           | S_TIDD_8      |
| 89      | 0                       | 0.000 | 116          | S_Def_6       | 0.058             | .000316 | 64           | S_Per_2       |
| 90      | 0                       | 0.000 | 115          | S_Def_5       | 0.058             | .000471 | 68           | S_Stab_2      |
| 91      | 0                       | 0.000 | 114          | S_Def_4       | 0.057             | .000483 | 15           | S_Bend_15     |
| 92      | 0                       | 0.000 | 113          | S_Def_3       | 0.057             | .000516 | 2            | S_Bend_2      |
| 93      | 0                       | 0.000 | 111          | S_Def_1       | 0.056             | .000316 | 104          | S_Per_22      |
| 94      | 0                       | 0.000 | 108          | S_TIDD_20     | 0.056             | .000316 | 48           | S_TIDD_20     |
| 95      | 0                       | 0.000 | 104          | S_TIDD_16     | 0.056             | .000568 | 60           | S_Hel_16      |
| 96      | 0                       | 0.000 | 97           | S_TIDD_9      | 0.056             | .000483 | 43           | S_Per_21      |
| 97      | 0                       | 0.000 | 92           | S_TIDD_4      | 0.054             | .000422 | 22           | S_Bend_22     |
| 98      | 0                       | 0.000 | 91           | S_TIDD_3      | 0.054             | .000316 | 26           | S_Per_4       |
| 99      | 0                       | 0.000 | 87           | S_Stab_21     | 0.054             | .000422 | 105          | S_TIDD_17     |
| 100     | 0                       | 0.000 | 86           | S_Stab_20     | 0.054             | .000422 | 4            | S_Bend_4      |
| 101     | 0                       | 0.000 | 84           | S_Stab_18     | 0.053             | .000422 | 128          | S_Def_18      |
| 102     | 0                       | 0.000 | 77           | S_Stab_11     | 0.053             | .000316 | 17           | S_Bend_17     |
| 103     | 0                       | 0.000 | 75           | S_Stab_9      | 0.053             | .000422 | 84           | S_Stab_18     |
| 104     | 0                       | 0.000 | 70           | S_Stab_4      | 0.053             | .000527 | 21           | S_Bend_21     |
| 105     | 0                       | 0.000 | 69           | S_Stab_3      | 0.052             | .000422 | 111          | S_Def_1       |
| 106     | 0                       | 0.000 | 66           | S_Hel_22      | 0.052             | .000527 | 67           | S_Stab_1      |
| 107     | 0                       | 0.000 | 64           | S_Hel_20      | 0.051             | .000422 | 48           | S_Hel_4       |
| 108     | 0                       | 0.000 | 62           | S_Hel_18      | 0.051             | .000471 | 35           | S_Per_13      |
| 109     | 0                       | 0.000 | 59           | S_Hel_15      | 0.050             | .000316 | 38           | S_Per_16      |
| 110     | 0                       | 0.000 | 57           | S_Hel_13      | 0.050             | .000000 | 46           | S_Hel_2       |
| 111     | 0                       | 0.000 | 51           | S_Hel_7       | 0.048             | .000316 | 92           | S_TIDD_4      |
| 112     | 0                       | 0.000 | 50           | S_Hel_6       | 0.048             | .000000 | 16           | S_Bend_16     |
| 113     | 0                       | 0.000 | 49           | S_Hel_5       | 0.048             | .000422 | 129          | S_Def_19      |
| 114     | 0                       | 0.000 | 45           | S_Hel_1       | 0.048             | .000699 | 131          | S_Def_21      |
| 115     | 0                       | 0.000 | 44           | S_Per_22      | 0.046             | .000316 | 67           | S_Stab_21     |
| 116     | 0                       | 0.000 | 43           | S_Per_21      | 0.046             | .000316 | 82           | S_Hel_18      |
| 117     | 0                       | 0.000 | 41           | S_Per_19      | 0.046             | .000316 | 37           | S_Per_15      |
| 118     | 0                       | 0.000 | 38           | S_Per_16      | 0.044             | .000000 | 59           | S_Hel_15      |
| 119     | 0                       | 0.000 | 37           | S_Per_15      | 0.043             | .000422 | 66           | S_Hel_22      |
| 120     | 0                       | 0.000 | 33           | S_Per_11      | 0.043             | .000316 | 42           | S_Per_20      |
| 121     | 0                       | 0.000 | 31           | S_Per_9       | 0.040             | .000483 | 40           | S_Per_18      |
| 122     | 0                       | 0.000 | 29           | S_Per_7       | 0.040             | .000316 | 90           | S_TIDD_2      |
| 123     | 0                       | 0.000 | 23           | S_Per_1       | 0.039             | .000316 | 110          | S_TIDD_22     |
| 124     | 0                       | 0.000 | 22           | S_Bend_22     | 0.036             | .000316 | 107          | S_TIDD_19     |
| 125     | 0                       | 0.000 | 19           | S_Bend_19     | 0.035             | .000516 | 1            | S_Bend_1      |
| 126     | 0                       | 0.000 | 18           | S_Bend_18     | 0.035             | .000000 | 109          | S_TIDD_21     |
| 127     | 0                       | 0.000 | 17           | S_Bend_17     | 0.035             | .000000 | 89           | S_TIDD_1      |
| 128     | 0                       | 0.000 | 15           | S_Bend_15     | 0.035             | .000483 | 23           | S_Per_1       |
| 129     | 0                       | 0.000 | 12           | S_Bend_12     | 0.033             | .000422 | 106          | S_TIDD_18     |
| 130     | 0                       | 0.000 | 11           | S_Bend_11     | 0.031             | .000516 | 45           | S_Hel_1       |
| 131     | 0                       | 0.000 | 8            | S_Bend_8      | 0.031             | .000483 | 64           | S_Hel_20      |
| 132     | 0                       | 0.000 | 6            | S_Bend_6      | 0.027             | .000000 | 41           | S_Per_19      |

**Table S5. Evaluation of best variable subsets using different variable rankings.** Best subsets were selected based on results of 10

| repetitions of testing models that were trained on 64 elements with the set of 136 elements: |               | Classification accuracy |       | Kappa statistic |       |       | Precision |       | Recall |       | Matthews CC |       | Area under ROC curve |       |
|----------------------------------------------------------------------------------------------|---------------|-------------------------|-------|-----------------|-------|-------|-----------|-------|--------|-------|-------------|-------|----------------------|-------|
| Ranking method                                                                               | Subset        | Mean                    | STD   | Mean            | STD   | 0.017 | Mean      | STD   | Mean   | STD   | Mean        | STD   | Mean                 | STD   |
| none                                                                                         | 132 variables | 0.919                   | 0.013 | 0.885           | 0.017 | 0.014 | 0.927     | 0.014 | 0.919  | 0.013 | 0.890       | 0.018 | 0.988                | 0.011 |
| ReliefF                                                                                      | 16 variables  | 0.975                   | 0.029 | 0.964           | 0.038 | 0.032 | 0.976     | 0.032 | 0.975  | 0.029 | 0.967       | 0.039 | 0.994                | 0.006 |
| CFS                                                                                          | 20 variables  | 0.956                   | 0.012 | 0.936           | 0.017 | 0.012 | 0.958     | 0.012 | 0.956  | 0.012 | 0.938       | 0.016 | 0.988                | 0.007 |
| P value ranking                                                                              | 24 variables  | 0.919                   | 0.025 | 0.886           | 0.033 | 0.024 | 0.931     | 0.024 | 0.919  | 0.025 | 0.887       | 0.033 | 0.928                | 0.010 |

**Table S6. Classification tests using the subset of 16 highest ranked variables.** Subsets of elements that were the most frequently inaccurately classified (low classification frequency, CF) were removed to test the effect that this had on construction of predictive models. The classification tests comprised (i) 10-fold cross validations using the training dataset (CV\_64), (ii) testing the trained models with the testing dataset (Test) and (iii) 10-fold CVs using the full set of 200 elements (CV\_200). Standard deviations (STD) of the classification results are given.

| Element       | Classification frequency (CF) | MOB group | MOB subgroup | Possible cause for low CF                  | Removed subset based on CF cutoff | Average classification accuracy |       |       |       |        |       | Kappa statistic                  |       |       |       |        |       | Precision (Pre)      |       |       |       |        |       |
|---------------|-------------------------------|-----------|--------------|--------------------------------------------|-----------------------------------|---------------------------------|-------|-------|-------|--------|-------|----------------------------------|-------|-------|-------|--------|-------|----------------------|-------|-------|-------|--------|-------|
|               |                               |           |              |                                            |                                   | CV_64                           | STD   | Test  | STD   | CV_200 | STD   | CV_64                            | STD   | Test  | STD   | CV_200 | STD   | CV_64                | STD   | Test  | STD   | CV_200 | STD   |
|               |                               |           |              |                                            | A                                 | 0.790                           | 0.030 | 0.974 | 0.004 | 0.949  | 0.006 | 0.692                            | 0.044 | 0.962 | 0.006 | 0.926  | 0.012 | 0.842                | 0.041 | 0.975 | 0.004 | 0.958  | 0.007 |
| pNL1          | 0                             | F         | 1            | unique element in subgroup                 | B(=0)                             | 0.936                           | 0.026 | 0.871 | 0.000 | 0.964  | 0.006 | 0.900                            | 0.042 | 0.813 | 0.000 | 0.948  | 0.009 | 0.953                | 0.027 | 0.875 | 0.000 | 0.970  | 0.005 |
| pTi-VirD2(RB) | 0                             | P         | 2            | unique element                             |                                   |                                 |       |       |       |        |       |                                  |       |       |       |        |       |                      |       |       |       |        |       |
| pC221         | 0                             | P         | 7            | unique element                             |                                   |                                 |       |       |       |        |       |                                  |       |       |       |        |       |                      |       |       |       |        |       |
| pIP501        | 0                             | Q         | 3            | unique element                             |                                   |                                 |       |       |       |        |       |                                  |       |       |       |        |       |                      |       |       |       |        |       |
| pKJ36         | 0                             | Q         | u            | subgroup unknown                           |                                   |                                 |       |       |       |        |       |                                  |       |       |       |        |       |                      |       |       |       |        |       |
| pTA1060       | 0                             | V         | 1            | subgroup unknown                           |                                   |                                 |       |       |       |        |       |                                  |       |       |       |        |       |                      |       |       |       |        |       |
| Tn4451        | 0                             | V         | u            | subgroup unknown                           |                                   |                                 |       |       |       |        |       |                                  |       |       |       |        |       |                      |       |       |       |        |       |
|               |                               |           |              | separate cluster from elements in subgroup | C(<0.1)                           | 0.941                           | 0.024 | 0.881 | 0.005 | 0.959  | 0.008 | 0.909                            | 0.038 | 0.823 | 0.007 | 0.941  | 0.012 | 0.959                | 0.025 | 0.893 | 0.006 | 0.967  | 0.007 |
| pHW0          | 0.03                          | F         | 11           | subgroup                                   |                                   |                                 |       |       |       |        |       |                                  |       |       |       |        |       |                      |       |       |       |        |       |
| ColE1         | 0.13                          | P         | 8            | unique element                             | D(<0.2)                           | 0.979                           | 0.018 | 0.769 | 0.002 | 0.969  | 0.006 | 0.967                            | 0.028 | 0.696 | 0.003 | 0.942  | 0.009 | 0.986                | 0.018 | 0.769 | 0.003 | 0.967  | 0.006 |
| pIP421        | 0.26                          | V         | 4            | subgroup                                   | E(<0.3)                           | 0.977                           | 0.020 | 0.819 | 0.006 | 0.965  | 0.006 | 0.965                            | 0.033 | 0.738 | 0.008 | 0.949  | 0.009 | 0.990                | 0.014 | 0.826 | 0.004 | 0.972  | 0.005 |
| pAB6          | 0.34                          | Q         | 1            | subgroup                                   | F(<0.5)                           | 0.960                           | 0.013 | 0.853 | 0.006 | 0.965  | 0.006 | 0.937                            | 0.023 | 0.785 | 0.009 | 0.950  | 0.009 | 0.970                | 0.021 | 0.858 | 0.006 | 0.972  | 0.005 |
| R6K           | 0.39                          | P         | 3            | unique element                             |                                   |                                 |       |       |       |        |       |                                  |       |       |       |        |       |                      |       |       |       |        |       |
|               |                               |           |              |                                            |                                   | Recall (Rec)                    |       |       |       |        |       | Matthews correlation coefficient |       |       |       |        |       | Area under ROC curve |       |       |       |        |       |
|               |                               |           |              |                                            | Removed subset based on CF cutoff | CV_64                           | STD   | Test  | STD   | CV_200 | STD   | CV_64                            | STD   | Test  | STD   | CV_200 | STD   | CV_64                | STD   | Test  | STD   | CV_200 | STD   |
|               |                               |           |              |                                            | A                                 | 0.790                           | 0.030 | 0.973 | 0.005 | 0.949  | 0.008 | 0.728                            | 0.045 | 0.965 | 0.005 | 0.931  | 0.011 | 0.824                | 0.017 | 0.894 | 0.001 | 0.966  | 0.003 |
|               |                               |           |              |                                            | B(=0)                             | 0.935                           | 0.026 | 0.871 | 0.000 | 0.964  | 0.006 | 0.915                            | 0.036 | 0.806 | 0.000 | 0.951  | 0.009 | 0.992                | 0.007 | 0.949 | 0.001 | 0.990  | 0.002 |
|               |                               |           |              |                                            |                                   |                                 |       |       |       |        |       |                                  |       |       |       |        |       |                      |       |       |       |        |       |
|               |                               |           |              |                                            | C(<0.1)                           | 0.941                           | 0.024 | 0.881 | 0.005 | 0.959  | 0.008 | 0.923                            | 0.033 | 0.825 | 0.008 | 0.945  | 0.011 | 0.997                | 0.011 | 0.930 | 0.002 | 0.990  | 0.003 |
|               |                               |           |              |                                            | D(<0.2)                           | 0.979                           | 0.018 | 0.763 | 0.002 | 0.960  | 0.006 | 0.971                            | 0.029 | 0.661 | 0.004 | 0.946  | 0.008 | 0.998                | 0.014 | 0.834 | 0.002 | 0.990  | 0.002 |
|               |                               |           |              |                                            | E(<0.3)                           | 0.977                           | 0.019 | 0.818 | 0.006 | 0.965  | 0.006 | 0.972                            | 0.028 | 0.731 | 0.008 | 0.954  | 0.009 | 0.998                | 0.014 | 0.832 | 0.001 | 0.991  | 0.002 |
|               |                               |           |              |                                            | F(<0.5)                           | 0.960                           | 0.014 | 0.853 | 0.006 | 0.965  | 0.006 | 0.947                            | 0.021 | 0.780 | 0.009 | 0.954  | 0.008 | 0.999                | 0.003 | 0.927 | 0.002 | 0.991  | 0.002 |

Continued below...

Continued from above...

Table S7. Ranges of potential transfer hosts based on pooling known transfer host clades found in the training sets of either 64 or 200 elements.

| MOB group                                  | Potential transfer host clades         | Clade                | Phylum               |
|--------------------------------------------|----------------------------------------|----------------------|----------------------|
| F                                          | <i>Escherichia coli</i>                | Enterobacteriales    | Gammaaproteobacteria |
|                                            | <i>Nostoc</i> sp.                      | Nostocales           | Cyanobacteria        |
|                                            | <i>Novosphingobium aromaticivorans</i> | Sphingomonadales     | Alphaaproteobacteria |
|                                            | <i>Pseudomonas putida</i>              | Pseudomonadales      | Gammaaproteobacteria |
|                                            | <i>Pseudomonas</i> sp.                 | Pseudomonadales      | Gammaaproteobacteria |
|                                            | <i>Salmonella enterica</i>             | Enterobacteriales    | Gammaaproteobacteria |
|                                            | <i>Salmonella typhi</i>                | Enterobacteriales    | Gammaaproteobacteria |
|                                            | <i>Salmonella typhimurium</i>          | Enterobacteriales    | Gammaaproteobacteria |
|                                            | <i>Shigella flexneri</i>               | Enterobacteriales    | Gammaaproteobacteria |
|                                            | <i>Acidithiobacillus caldus</i>        | Acidithiobacillales  | Gammaaproteobacteria |
|                                            | <i>Acidithiobacillus ferrooxidans</i>  | Acidithiobacillales  | Gammaaproteobacteria |
|                                            | <i>Agrobacterium tumefaciens</i>       | Rhizobiales          | Alphaaproteobacteria |
|                                            | <i>Collimonas fungivorans</i>          | Burkholderiales      | Betaaproteobacteria  |
|                                            | <i>Enterobacter aerogenes</i>          | Enterobacteriales    | Gammaaproteobacteria |
|                                            | <i>Escherichia coli</i>                | Enterobacteriales    | Gammaaproteobacteria |
|                                            | <i>Pseudomonas aeruginosa</i>          | Pseudomonadales      | Gammaaproteobacteria |
|                                            | <i>Pseudomonas alcaligenes</i>         | Pseudomonadales      | Gammaaproteobacteria |
| <i>Salmonella typhimurium</i>              | Enterobacteriales                      | Gammaaproteobacteria |                      |
| <i>Staphylococcus aureus</i>               | Bacillales                             | Firmicutes           |                      |
| <i>Vibrio fischeri</i>                     | Vibrionales                            | Gammaaproteobacteria |                      |
| <i>Xanthobacter autotrophicus</i>          | Rhizobiales                            | Alphaaproteobacteria |                      |
| <i>Bacillus subtilis</i>                   | Bacillales                             | Firmicutes           |                      |
| <i>Bacteroides fragilis</i>                | Bacteroidales                          | Bacteroidetes        |                      |
| <i>Bacteroides uniformis</i>               | Bacteroidales                          | Bacteroidetes        |                      |
| <i>Bordetella bronchiseptica</i>           | Burkholderiales                        | Betaaproteobacteria  |                      |
| <i>Butyrivibrio fibrivorans</i>            | Clostridiales                          | Firmicutes           |                      |
| <i>Clostridium perfringens</i>             | Clostridiales                          | Firmicutes           |                      |
| <i>Flavobacterium</i> sp.                  | Flavobacteriales                       | Bacteroidetes        |                      |
| <i>Lactobacillus hilgardii</i>             | Lactobacillales                        | Firmicutes           |                      |
| <i>Listeria monocytogenes</i>              | Bacillales                             | Firmicutes           |                      |
| <i>Oenococcus oeni</i>                     | Lactobacillales                        | Firmicutes           |                      |
| <i>Staphylococcus cohnii</i>               | Bacillales                             | Firmicutes           |                      |
| <i>Streptococcus agalactiae</i>            | Lactobacillales                        | Firmicutes           |                      |
| <i>Streptococcus ferus</i>                 | Bacillales                             | Firmicutes           |                      |
| <i>Tropaea verticilla</i>                  | Spirochaetales                         | Spirochaetes         |                      |
| P                                          | <i>Escherichia coli</i>                | Enterobacteriales    | Gammaaproteobacteria |
|                                            | <i>Nebactinia pneumoniae</i>           | Enterobacteriales    | Gammaaproteobacteria |
|                                            | <i>Nostoc</i> sp.                      | Nostocales           | Cyanobacteria        |
|                                            | <i>Novosphingobium aromaticivorans</i> | Sphingomonadales     | Alphaaproteobacteria |
|                                            | <i>Pseudomonas putida</i>              | Pseudomonadales      | Gammaaproteobacteria |
|                                            | <i>Pseudomonas</i> sp.                 | Pseudomonadales      | Gammaaproteobacteria |
|                                            | <i>Rhodococcus erythropolis</i>        | Actinomycetales      | Actinobacteria       |
|                                            | <i>Salmonella enterica</i>             | Enterobacteriales    | Gammaaproteobacteria |
|                                            | <i>Salmonella typhi</i>                | Enterobacteriales    | Gammaaproteobacteria |
|                                            | <i>Salmonella typhimurium</i>          | Enterobacteriales    | Gammaaproteobacteria |
|                                            | <i>Shigella flexneri</i>               | Enterobacteriales    | Gammaaproteobacteria |
|                                            | <i>Achromobacter denitrificans</i>     | Burkholderiales      | Betaaproteobacteria  |
|                                            | <i>Achromobacter xylosoxidans</i>      | Burkholderiales      | Betaaproteobacteria  |
|                                            | <i>Acidithiobacillus caldus</i>        | Acidithiobacillales  | Gammaaproteobacteria |
|                                            | <i>Acidithiobacillus ferrooxidans</i>  | Acidithiobacillales  | Gammaaproteobacteria |
|                                            | <i>Aeromonas</i> sp.                   | Rhizobiales          | Betaaproteobacteria  |
|                                            | <i>Agrobacterium tumefaciens</i>       | Rhizobiales          | Alphaaproteobacteria |
| <i>Bordetella pertussis</i>                | Burkholderiales                        | Betaaproteobacteria  |                      |
| <i>Citrobacter koseri</i>                  | Enterobacteriales                      | Gammaaproteobacteria |                      |
| <i>Collimonas fungivorans</i>              | Burkholderiales                        | Betaaproteobacteria  |                      |
| <i>Deftia acidovorans</i>                  | Burkholderiales                        | Betaaproteobacteria  |                      |
| <i>Enterobacter aerogenes</i>              | Enterobacteriales                      | Gammaaproteobacteria |                      |
| <i>Enterobacter cloacae</i>                | Enterobacteriales                      | Gammaaproteobacteria |                      |
| <i>Enterococcus faecium</i>                | Lactobacillales                        | Firmicutes           |                      |
| <i>Erwinia stewartii</i>                   | Enterobacteriales                      | Gammaaproteobacteria |                      |
| <i>Erwinia tasmaniensis</i>                | Enterobacteriales                      | Gammaaproteobacteria |                      |
| <i>Escherichia coli</i>                    | Enterobacteriales                      | Gammaaproteobacteria |                      |
| <i>Hafnia alvei</i>                        | Enterobacteriales                      | Gammaaproteobacteria |                      |
| <i>Lactobacillus brevis</i>                | Lactobacillales                        | Firmicutes           |                      |
| <i>Mesorhizobium</i> sp.                   | Rhizobiales                            | Alphaaproteobacteria |                      |
| <i>Pantoea citrea</i>                      | Enterobacteriales                      | Gammaaproteobacteria |                      |
| <i>Pseudomonas aeruginosa</i>              | Pseudomonadales                        | Gammaaproteobacteria |                      |
| <i>Pseudomonas alcaligenes</i>             | Pseudomonadales                        | Gammaaproteobacteria |                      |
| <i>Pseudomonas</i> sp.                     | Pseudomonadales                        | Gammaaproteobacteria |                      |
| <i>Ralstonia eutropha</i>                  | Burkholderiales                        | Betaaproteobacteria  |                      |
| <i>Rhodobacter sphaeroides</i>             | Rhodobacterales                        | Alphaaproteobacteria |                      |
| <i>Salmonella choleraesuis</i>             | Enterobacteriales                      | Gammaaproteobacteria |                      |
| <i>Salmonella enterica serovar Borneze</i> | Enterobacteriales                      | Gammaaproteobacteria |                      |
| <i>Salmonella enterica subsp. enterica</i> | Enterobacteriales                      | Gammaaproteobacteria |                      |
| <i>Salmonella enteritidis</i>              | Enterobacteriales                      | Gammaaproteobacteria |                      |
| <i>Salmonella typhimurium</i>              | Enterobacteriales                      | Gammaaproteobacteria |                      |
| <i>Shigella sonnei</i>                     | Enterobacteriales                      | Gammaaproteobacteria |                      |
| <i>Sphingomonas</i> sp.                    | Sphingomonadales                       | Alphaaproteobacteria |                      |
| <i>Staphylococcus aureus</i>               | Bacillales                             | Firmicutes           |                      |
| <i>Staphylococcus epidermidis</i>          | Bacillales                             | Firmicutes           |                      |
| <i>Staphylococcus haemolyticus</i>         | Bacillales                             | Firmicutes           |                      |
| <i>Vibrio fischeri</i>                     | Vibrionales                            | Gammaaproteobacteria |                      |
| <i>Xylella fastidiosa</i>                  | Xanthomonadales                        | Gammaaproteobacteria |                      |
| <i>Xylella fastidiosa</i>                  | Xanthomonadales                        | Gammaaproteobacteria |                      |
| <i>Yersinia pseudotuberculosis</i>         | Enterobacteriales                      | Gammaaproteobacteria |                      |
| <i>Acidithiobacillus caldus</i>            | Acidithiobacillales                    | Gammaaproteobacteria |                      |
| <i>Acidithiobacillus ferrooxidans</i>      | Acidithiobacillales                    | Gammaaproteobacteria |                      |
| <i>Acidithiobacillus pleuroaerophilus</i>  | Pasteurellales                         | Gammaaproteobacteria |                      |
| <i>Agrobacterium rhizogenes</i>            | Rhizobiales                            | Alphaaproteobacteria |                      |
| <i>Agrobacterium tumefaciens</i>           | Rhizobiales                            | Alphaaproteobacteria |                      |
| <i>Bifidobacterium longum</i>              | Bifidobacteriales                      | Actinobacteria       |                      |
| <i>Caulobacter</i> sp.                     | Caulobacteriales                       | Alphaaproteobacteria |                      |
| <i>Dichelobacter nodosus</i>               | Ceroidbacteriales                      | Gammaaproteobacteria |                      |
| <i>Escherichia coli</i>                    | Enterobacteriales                      | Gammaaproteobacteria |                      |
| <i>Mesorhizobium</i> sp.                   | Rhizobiales                            | Alphaaproteobacteria |                      |
| <i>Neisseria meningitidis</i>              | Neisseriales                           | Betaaproteobacteria  |                      |
| <i>Oligotropha carboxidovorans</i>         | Rhizobiales                            | Alphaaproteobacteria |                      |
| <i>Pasteurella multocida</i>               | Pasteurellales                         | Gammaaproteobacteria |                      |
| <i>Rhizobium etli</i>                      | Rhizobiales                            | Alphaaproteobacteria |                      |
| <i>Rhizobium leguminosarum</i>             | Rhizobiales                            | Alphaaproteobacteria |                      |
| <i>Rhizobium</i> sp.                       | Rhizobiales                            | Alphaaproteobacteria |                      |
| <i>Rhodobacter blasticus</i>               | Rhodobacterales                        | Alphaaproteobacteria |                      |
| <i>Salmonella enteritidis</i>              | Enterobacteriales                      | Gammaaproteobacteria |                      |
| <i>Salmonella typhimurium</i>              | Enterobacteriales                      | Gammaaproteobacteria |                      |
| <i>Sinorhizobium medicae</i>               | Planctomycetales                       | Planctomycetes       |                      |
| <i>Sinorhizobium meliloti</i>              | Planctomycetales                       | Planctomycetes       |                      |
| <i>Staphylococcus aureus</i>               | Bacillales                             | Firmicutes           |                      |
| <i>Streptococcus</i>                       | Lactobacillales                        | Firmicutes           |                      |
| <i>Xanthobacter autotrophicus</i>          | Rhizobiales                            | Alphaaproteobacteria |                      |
| <i>Bacillus cereus</i>                     | Bacillales                             | Firmicutes           |                      |
| <i>Bacillus subtilis</i>                   | Bacillales                             | Firmicutes           |                      |
| <i>Bacteroides fragilis</i>                | Bacteroidales                          | Bacteroidetes        |                      |
| <i>Bacteroides uniformis</i>               | Bacteroidales                          | Bacteroidetes        |                      |
| <i>Bordetella bronchiseptica</i>           | Burkholderiales                        | Betaaproteobacteria  |                      |
| <i>Butyrivibrio fibrivorans</i>            | Clostridiales                          | Firmicutes           |                      |
| <i>Clostridium perfringens</i>             | Clostridiales                          | Firmicutes           |                      |
| <i>Enterococcus faecalis</i>               | Lactobacillales                        | Firmicutes           |                      |
| <i>Flavobacterium</i> sp.                  | Flavobacteriales                       | Bacteroidetes        |                      |
| <i>Geobacillus stearothermophilus</i>      | Bacillales                             | Firmicutes           |                      |
| <i>Lactobacillus casei</i>                 | Lactobacillales                        | Firmicutes           |                      |
| <i>Lactobacillus hilgardii</i>             | Lactobacillales                        | Firmicutes           |                      |
| <i>Lactobacillus plantarum</i>             | Lactobacillales                        | Firmicutes           |                      |
| <i>Lactobacillus sakei</i>                 | Lactobacillales                        | Firmicutes           |                      |
| <i>Lactococcus lactis</i>                  | Lactobacillales                        | Firmicutes           |                      |
| <i>Listeria monocytogenes</i>              | Bacillales                             | Firmicutes           |                      |
| <i>Oenococcus oeni</i>                     | Lactobacillales                        | Firmicutes           |                      |
| <i>Pasteurella multocida</i>               | Pasteurellales                         | Gammaaproteobacteria |                      |
| <i>Rhodobacter sphaeroides</i>             | Rhodobacterales                        | Alphaaproteobacteria |                      |
| <i>Staphylococcus aureus</i>               | Bacillales                             | Firmicutes           |                      |
| <i>Staphylococcus cohnii</i>               | Bacillales                             | Firmicutes           |                      |
| <i>Staphylococcus saprophyticus</i>        | Bacillales                             | Firmicutes           |                      |
| <i>Streptococcus agalactiae</i>            | Lactobacillales                        | Firmicutes           |                      |
| <i>Streptococcus ferus</i>                 | Lactobacillales                        | Firmicutes           |                      |
| <i>Streptococcus pyogenes</i>              | Lactobacillales                        | Firmicutes           |                      |
| <i>Streptococcus suis</i>                  | Lactobacillales                        | Firmicutes           |                      |
| <i>Streptococcus thermophilus</i>          | Lactobacillales                        | Firmicutes           |                      |
| <i>Tropaea verticilla</i>                  | Spirochaetales                         | Spirochaetes         |                      |
| Q                                          | <i>Escherichia coli</i>                | Enterobacteriales    | Gammaaproteobacteria |
|                                            | <i>Nebactinia pneumoniae</i>           | Enterobacteriales    | Gammaaproteobacteria |
|                                            | <i>Nostoc</i> sp.                      | Nostocales           | Cyanobacteria        |
|                                            | <i>Novosphingobium aromaticivorans</i> | Sphingomonadales     | Alphaaproteobacteria |
|                                            | <i>Pseudomonas putida</i>              | Pseudomonadales      | Gammaaproteobacteria |
|                                            | <i>Pseudomonas</i> sp.                 | Pseudomonadales      | Gammaaproteobacteria |
|                                            | <i>Rhodococcus erythropolis</i>        | Actinomycetales      | Actinobacteria       |
|                                            | <i>Salmonella enterica</i>             | Enterobacteriales    | Gammaaproteobacteria |
|                                            | <i>Salmonella typhi</i>                | Enterobacteriales    | Gammaaproteobacteria |
|                                            | <i>Salmonella typhimurium</i>          | Enterobacteriales    | Gammaaproteobacteria |
|                                            | <i>Shigella flexneri</i>               | Enterobacteriales    | Gammaaproteobacteria |
|                                            | <i>Achromobacter denitrificans</i>     | Burkholderiales      | Betaaproteobacteria  |
|                                            | <i>Achromobacter xylosoxidans</i>      | Burkholderiales      | Betaaproteobacteria  |
|                                            | <i>Acidithiobacillus caldus</i>        | Acidithiobacillales  | Gammaaproteobacteria |
|                                            | <i>Acidithiobacillus ferrooxidans</i>  | Acidithiobacillales  | Gammaaproteobacteria |
|                                            | <i>Aeromonas</i> sp.                   | Rhizobiales          | Betaaproteobacteria  |
|                                            | <i>Agrobacterium tumefaciens</i>       | Rhizobiales          | Alphaaproteobacteria |
| <i>Bordetella pertussis</i>                | Burkholderiales                        | Betaaproteobacteria  |                      |
| <i>Citrobacter koseri</i>                  | Enterobacteriales                      | Gammaaproteobacteria |                      |
| <i>Collimonas fungivorans</i>              | Burkholderiales                        | Betaaproteobacteria  |                      |
| <i>Deftia acidovorans</i>                  | Burkholderiales                        | Betaaproteobacteria  |                      |
| <i>Enterobacter aerogenes</i>              | Enterobacteriales                      | Gammaaproteobacteria |                      |
| <i>Enterobacter cloacae</i>                | Enterobacteriales                      | Gammaaproteobacteria |                      |
| <i>Enterococcus faecium</i>                | Lactobacillales                        | Firmicutes           |                      |
| <i>Erwinia stewartii</i>                   | Enterobacteriales                      | Gammaaproteobacteria |                      |
| <i>Erwinia tasmaniensis</i>                | Enterobacteriales                      | Gammaaproteobacteria |                      |
| <i>Escherichia coli</i>                    | Enterobacteriales                      | Gammaaproteobacteria |                      |
| <i>Hafnia alvei</i>                        | Enterobacteriales                      | Gammaaproteobacteria |                      |
| <i>Lactobacillus brevis</i>                | Lactobacillales                        | Firmicutes           |                      |
| <i>Mesorhizobium</i> sp.                   | Rhizobiales                            | Alphaaproteobacteria |                      |
| <i>Pantoea citrea</i>                      | Enterobacteriales                      | Gammaaproteobacteria |                      |
| <i>Pseudomonas aeruginosa</i>              | Pseudomonadales                        | Gammaaproteobacteria |                      |
| <i>Pseudomonas alcaligenes</i>             | Pseudomonadales                        | Gammaaproteobacteria |                      |
| <i>Pseudomonas</i> sp.                     | Pseudomonadales                        | Gammaaproteobacteria |                      |
| <i>Ralstonia eutropha</i>                  | Burkholderiales                        | Betaaproteobacteria  |                      |
| <i>Rhodobacter sphaeroides</i>             | Rhodobacterales                        | Alphaaproteobacteria |                      |
| <i>Salmonella choleraesuis</i>             | Enterobacteriales                      | Gammaaproteobacteria |                      |
| <i>Salmonella enterica serovar Borneze</i> | Enterobacteriales                      | Gammaaproteobacteria |                      |
| <i>Salmonella enterica subsp. enterica</i> | Enterobacteriales                      | Gammaaproteobacteria |                      |
| <i>Salmonella enteritidis</i>              | Enterobacteriales                      | Gammaaproteobacteria |                      |
| <i>Salmonella typhimurium</i>              | Enterobacteriales                      | Gammaaproteobacteria |                      |
| <i>Shigella sonnei</i>                     | Enterobacteriales                      | Gammaaproteobacteria |                      |
| <i>Sphingomonas</i> sp.                    | Sphingomonadales                       | Alphaaproteobacteria |                      |
| <i>Staphylococcus aureus</i>               | Bacillales                             | Firmicutes           |                      |
| <i>Staphylococcus epidermidis</i>          | Bacillales                             | Firmicutes           |                      |
| <i>Staphylococcus haemolyticus</i>         | Bacillales                             | Firmicutes           |                      |
| <i>Vibrio fischeri</i>                     | Vibrionales                            | Gammaaproteobacteria |                      |
| <i>Xylella fastidiosa</i>                  | Xanthomonadales                        | Gammaaproteobacteria |                      |
| <i>Xylella fastidiosa</i>                  | Xanthomonadales                        | Gammaaproteobacteria |                      |
| <i>Yersinia pseudotuberculosis</i>         | Enterobacteriales                      | Gammaaproteobacteria |                      |
| <i>Acidithiobacillus caldus</i>            | Acidithiobacillales                    | Gammaaproteobacteria |                      |
| <i>Acidithiobacillus ferrooxidans</i>      | Acidithiobacillales                    | Gammaaproteobacteria |                      |
| <i>Acidithiobacillus pleuroaerophilus</i>  | Pasteurellales                         | Gammaaproteobacteria |                      |
| <i>Agrobacterium rhizogenes</i>            | Rhizobiales                            | Alphaaproteobacteria |                      |
| <i>Agrobacterium tumefaciens</i>           | Rhizobiales                            | Alphaaproteobacteria |                      |
| <i>Bifidobacterium longum</i>              | Bifidobacteriales                      | Actinobacteria       |                      |
| <i>Caulobacter</i> sp.                     | Caulobacteriales                       | Alphaaproteobacteria |                      |
| <i>Dichelobacter nodosus</i>               | Ceroidbacteriales                      | Gammaaproteobacteria |                      |
| <i>Escherichia coli</i>                    | Enterobacteriales                      | Gammaaproteobacteria |                      |
| <i>Mesorhizobium</i> sp.                   | Rhizobiales                            | Alphaaproteobacteria |                      |
| <i>Neisseria meningitidis</i>              | Neisseriales                           | Betaaproteobacteria  |                      |
| <i>Oligotropha carboxidovorans</i>         | Rhizobiales                            | Alphaaproteobacteria |                      |
| <i>Pasteurella multocida</i>               | Pasteurellales                         | Gammaaproteobacteria |                      |
| <i>Rhizobium etli</i>                      | Rhizobiales                            | Alphaaproteobacteria |                      |
| <i>Rhizobium leguminosarum</i>             | Rhizobiales                            | Alphaaproteobacteria |                      |
| <i>Rhizobium</i> sp.                       | Rhizobiales                            | Alphaaproteobacteria |                      |
| <i>Rhodobacter blasticus</i>               | Rhodobacterales                        | Alphaaproteobacteria |                      |
| <i>Salmonella enteritidis</i>              | Enterobacteriales                      | Gammaaproteobacteria |                      |
| <i>Salmonella typhimurium</i>              | Enterobacteriales                      | Gammaaproteobacteria |                      |
| <i>Sinorhizobium medicae</i>               | Planctomycetales                       | Planctomycetes       |                      |
| <i>Sinorhizobium meliloti</i>              | Planctomycetales                       | Planctomycetes       |                      |
| <i>Staphylococcus aureus</i>               | Bacillales                             | Firmicutes           |                      |
| <i>Streptococcus</i>                       | Lactobacillales                        | Firmicutes           |                      |
| <i>Xanthobacter autotrophicus</i>          | Rhizobiales                            | Alphaaproteobacteria |                      |
| <i>Bacillus cereus</i>                     | Bacillales                             | Firmicutes           |                      |
| <i>Bacillus subtilis</i>                   | Bacillales                             | Firmicutes           |                      |
| <i>Bacteroides fragilis</i>                | Bacteroidales                          | Bacteroidetes        |                      |
| <i>Bacteroides uniformis</i>               | Bacteroidales                          | Bacteroidetes        |                      |
| <i>Bordetella bronchiseptica</i>           | Burkholderiales                        | Betaaproteobacteria  |                      |
| <i>Butyrivibrio fibrivorans</i>            | Clostridiales                          | Firmicutes           |                      |
| <i>Clostridium perfringens</i>             | Clostridiales                          | Firmicutes           |                      |
| <i>Enterococcus faecalis</i>               | Lactobacillales                        | Firmicutes           |                      |
| <i>Flavobacterium</i> sp.                  | Flavobacteriales                       | Bacteroidetes        |                      |
| <i>Geobacillus stearothermophilus</i>      | Bacillales                             | Firmicutes           |                      |
| <i>Lactobacillus casei</i>                 | Lactobacillales                        | Firmicutes           |                      |
| <i>Lactobacillus hilgardii</i>             | Lactobacillales                        | Firmicutes           |                      |
| <i>Lactobacillus plantarum</i>             | Lactobacillales                        | Firmicutes           |                      |
| <i>Lactobacillus sakei</i>                 | Lactobacillales                        | Firmicutes           |                      |
| <i>Lactococcus lactis</i>                  | Lactobacillales                        | Firmicutes           |                      |
| <i>Listeria monocytogenes</i>              | Bacillales                             | Firmicutes           |                      |
| <i>Oenococcus oeni</i>                     | Lactobacillales                        | Firmicutes           |                      |
| <i>Pasteurella multocida</i>               | Pasteurellales                         | Gammaaproteobacteria |                      |
| <i>Rhodobacter sphaeroides</i>             | Rhodobacterales                        | Alphaaproteobacteria |                      |
| <i>Staphylococcus aureus</i>               | Bacillales                             | Firmicutes           |                      |
| <i>Staphylococcus cohnii</i>               | Bacillales                             | Firmicutes           |                      |
| <i>Staphylococcus saprophyticus</i>        | Bacillales                             | Firmicutes           |                      |
| <i>Streptococcus agalactiae</i>            | Lactobacillales                        | Firmicutes           |                      |
| <i>Streptococcus ferus</i>                 | Lactobacillales                        | Firmicutes           |                      |
| <i>Streptococcus pyogenes</i>              | Lactobacillales                        | Firmicutes           |                      |
| <i>Streptococcus suis</i>                  | Lactobacillales                        | Firmicutes           |                      |
| <i>Streptococcus thermophilus</i>          | Lactobacillales                        | Firmicutes           |                      |
| <i>Tropaea verticilla</i>                  | Spirochaetales                         | Spirochaetes         |                      |

**Table S8. Ranges of potential incompatibility and replication (Inc/Rep) types based on pooling known Inc/Rep types found in the training sets of either 64 or 200 elements.**

|                    | MOB group   | Inc/Rep types |                     | MOB group | Inc/Rep types |
|--------------------|-------------|---------------|---------------------|-----------|---------------|
| Set of 64 elements | F           | IncFI         | Set of 200 elements | F         | IncFI         |
|                    |             | IncFII        |                     |           | IncZ          |
|                    | IncFV       | ColE2/E3      |                     |           |               |
|                    | IncN        | pCD1          |                     |           |               |
| P                  | P           | IncP-9        | IncFII              |           |               |
|                    |             | IncW          | IncFV               |           |               |
|                    |             | pNL1          | IncN                |           |               |
|                    |             | ColE          | IncP-9              |           |               |
|                    |             | Inc4          | IncW                |           |               |
|                    |             | IncB/O        | pCD, IncT/Phage P1  |           |               |
|                    |             | IncFII        | pNL1                |           |               |
|                    |             | Incl-1alpha   | pREC1               |           |               |
|                    |             | Incl2         | ColE                |           |               |
|                    |             | IncP-1        | Inc10               |           |               |
| Q                  | Q           | IncP-4 (IncQ) | Inc14               |           |               |
|                    |             | IncX2         | Inc4                |           |               |
|                    |             | PromA         | IncB/O              |           |               |
|                    |             | RepABC        | IncFI               |           |               |
|                    |             | ColE2/ColE3   | IncFII              |           |               |
| V                  | V           | Inc13, Inc7   | IncG/P6             |           |               |
|                    |             | IncP-4 (IncQ) | Incl-1alpha         |           |               |
|                    |             | RepABC        | Incl2               |           |               |
|                    |             | pNAC2         | IncK                |           |               |
|                    |             | pSC101        | IncP-1alpha         |           |               |
|                    |             | Inc11         | IncP-1beta          |           |               |
|                    |             | P             | P                   | Inc13     | IncP-4 (IncQ) |
|                    |             |               |                     | Inc4      | IncP-6        |
|                    |             |               |                     | IncB/O    | IncX1         |
|                    |             |               |                     | IncFI     | IncX2         |
| IncFII             | PromA       |               |                     |           |               |
| IncG/P6            | RepABC      |               |                     |           |               |
| Incl-1alpha        | ColE2/ColE3 |               |                     |           |               |
| Incl2              | Inc1        |               |                     |           |               |
| IncK               | Inc13       |               |                     |           |               |
| IncP-1alpha        | Inc7        |               |                     |           |               |
| Q                  | Q           | IncP-1beta    | IncP-4 (IncQ)       |           |               |
|                    |             | IncP-4 (IncQ) | RepABC              |           |               |
|                    |             | IncP-6        | pNAC2               |           |               |
|                    |             | IncX1         | pKJ50               |           |               |
|                    |             | IncX2         | pSC101              |           |               |
| V                  | V           | PromA         | Inc11               |           |               |
|                    |             | RepABC        | Inc13               |           |               |
|                    |             | ColE2/ColE3   | Inc4                |           |               |
|                    |             | Inc1          | IncQ                |           |               |
|                    |             | Inc13         |                     |           |               |

## References

- Abo, T., and Ohtsubo, E. (1995). Characterization of the functional sites in the oriT region involved in DNA transfer promoted by sex factor plasmid R100. *J. Bacteriol.* 177, 4350–4355.
- Avila, P., Núñez, B., and de la Cruz, F. (1996). Plasmid R6K Contains Two Functional oriTs which can Assemble Simultaneously in Relaxosomes in vivo. *J. Mol. Biol.* 261, 135–143.
- Bhattacharjee, M.K., and Meyer, R.J. (1991). A segment of a plasmid gene required for conjugal transfer encodes a site-specific, single-strand DNA endonuclease and ligase. *Nucleic Acids Res.* 19, 1129–1137.
- Bramucci, M., Chen, M., and Nagarajan, V. (2006). Genetic organization of a plasmid from an industrial wastewater bioreactor. *Appl. Microbiol. Biotechnol.* 71, 67–74.
- Caryl, J.A., Smith, M.C., and Thomas, C.D. (2004). Reconstitution of a staphylococcal plasmid-protein relaxation complex in vitro. *J. Bacteriol.* 186, 3374–3383.
- Chu, C., Chiu, C.-H., Chu, C.-H., and Ou, J.T. (2002). Nucleotide and amino acid sequences of oriT-traM-traJ-traY-traA-traL regions and mobilization of virulence plasmids of *Salmonella enterica* serovars Enteritidis, Gallinarum-Pullorum, and Typhimurium. *J. Bacteriol.* 184, 2857–2862.
- Climo, M.W., Sharma, V.K., and Archer, G.L. (1996). Identification and characterization of the origin of conjugative transfer (oriT) and a gene (nes) encoding a single-stranded endonuclease on the staphylococcal plasmid pGO1. *J. Bacteriol.* 178, 4975–4983.
- Cook, D.M., and Farrand, S.K. (1992). The oriT region of the *Agrobacterium tumefaciens* Ti plasmid pTiC58 shares DNA sequence identity with the transfer origins of RSF1010 and RK2/RP4 and with T-region borders. *J. Bacteriol.* 174, 6238–6246.
- Coupland, G.M., Brown, A.M., and Willetts, N.S. (1987). The origin of transfer (oriT) of the conjugative plasmid R46: characterization by deletion analysis and DNA sequencing. *Mol. Gen. Genet.* 208, 219–225.
- Drolet, M., Zanga, P., and Lau, P.C.K. (1990). The mobilization and origin of transfer regions of a *Thiobacillus ferrooxidans* plasmid: relatedness to plasmids RSF1010 and pSC101. *Mol. Microbiol.* 4, 1381–1391.
- Dunn, A.K., Martin, M.O., and Stabb, E.V. (2005). Characterization of pES213, a small mobilizable plasmid from *Vibrio fischeri*. *Plasmid* 54, 114–134.
- Fariás, M.E., and Espinosa, M. (2000). Conjugal transfer of plasmid pMV158: uncoupling of the pMV158 origin of transfer from the mobilization gene mobM, and modulation of pMV158 transfer in *Escherichia coli* mediated by IncP plasmids. *Microbiology* 146, 2259–2265.
- Finlay, B.B., Frost, L.S., and Paranchych, W. (1986). Origin of transfer of IncF plasmids and nucleotide sequences of the type II oriT, traM, and traY alleles from ColB4-K98 and the type IV traY allele from R100-1. *J. Bacteriol.* 168, 132–139.
- Francia, M., Varsaki, A., Garcillán-Barcia, M.P., Latorre, A., Drainas, C., and Cruz, F. (2004). A classification scheme for mobilization regions of bacterial plasmids. *FEMS Microbiol. Rev.* 28, 79–100.
- Furuya, N., Nisioka, T., and Komano, T. (1991). Nucleotide sequence and functions of the oriT operon in Inc11 plasmid R64. *J. Bacteriol.* 173, 2231–2237.
- Greated, A., Lambertsen, L., Williams, P.A., and Thomas, C.M. (2002). Complete sequence of the

- IncP-9 TOL plasmid pWW0 from *Pseudomonas putida*. *Environ. Microbiol.* 4, 856–871.
- Guasch, A., Lucas, M., Moncalián, G., Cabezas, M., Pérez-Luque, R., Gomis-Rüth, F.X., de la Cruz, F., and Coll, M. (2003). Recognition and processing of the origin of transfer DNA by conjugative relaxase TrwC. *Nat. Struct. Mol. Biol.* 10, 1002–1010.
- Laurenzio, L., Frost, L.S., Finlay, B.B., and Paranchych, W. (1991). Characterization of the oriT region of the IncFV plasmid pED208. *Mol. Microbiol.* 5, 1779–1790.
- Llosa, M., Grandoso, G., and Cruz, F. de la (1995). Nicking activity of TrwC directed against the origin of transfer of the IncW plasmid R388. *J. Mol. Biol.* 246, 54–62.
- Matson, S.W., and Morton, B.S. (1991). *Escherichia coli* DNA helicase I catalyzes a site- and strand-specific nicking reaction at the F plasmid oriT. *J. Biol. Chem.* 266, 16232–16237.
- Mela, F., Fritsche, K., Boersma, H., Van Elsas, J.D., Bartels, D., Meyer, F., De Boer, W., Van Veen, J.A., and Leveau, J.H. (2008). Comparative genomics of the pIPO2/pSB102 family of environmental plasmids: sequence, evolution, and ecology of pTer331 isolated from *Collimonas fungivorans* Ter331. *FEMS Microbiol. Ecol.* 66, 45–62.
- Pansegrau, W., Ziegelin, G., and Lanka, E. (1988). The origin of conjugative IncP plasmid transfer: interaction with plasmid-encoded products and the nucleotide sequence at the relaxation site. *Biochim. Biophys. Acta BBA-Gene Struct. Expr.* 951, 365–374.
- Paterson, E.S., and Iyer, V.N. (1997). Localization of the nic site of IncN conjugative plasmid pCU1 through formation of a hybrid oriT. *J. Bacteriol.* 179, 5768–5776.
- Pérez-Mendoza, M., Schumacher, C., Suárez-García, F., Almazán-Almazán, M.C., Domingo-García, M., López-Garzón, F.J., and Seaton, N.A. (2006). Analysis of the microporous texture of a glassy carbon by adsorption measurements and Monte Carlo simulation. Evolution with chemical and physical activation. *Carbon* 44, 638–645.
- Rawlings, D.E., and Tietze, E. (2001). Comparative biology of IncQ and IncQ-like plasmids. *Microbiol. Mol. Biol. Rev.* 65, 481–496.
- Reygers, U., Wessel, R., Müller, H., and Hoffmann-Berling, H. (1991). Endonuclease activity of *Escherichia coli* DNA helicase I directed against the transfer origin of the F factor. *EMBO J.* 10, 2689.
- Rohrer, J., and Rawlings, D.E. (1992). Sequence analysis and characterization of the mobilization region of a broad-host-range plasmid, pTF-FC2, isolated from *Thiobacillus ferrooxidans*. *J. Bacteriol.* 174, 6230–6237.
- Scherzinger, E., Lurz, R., Otto, S., and Dobrinski, B. (1992). In vitro cleavage of double- and single-stranded DNA by plasmid RSF1010-encoded mobilization proteins. *Nucleic Acids Res.* 20, 41–48.
- Smith, C.J., and Parker, A.C. (1998). The Transfer Origin for *Bacteroides* Mobilizable Transposon Tn4555 Is Related to a Plasmid Family from Gram-Positive Bacteria. *J. Bacteriol.* 180, 435–439.
- Sut, M.V., Mihajlovic, S., Lang, S., Gruber, C.J., and Zechner, E.L. (2009). Protein and DNA effectors control the Tral conjugative helicase of plasmid R1. *J. Bacteriol.* 191, 6888–6899.
- Szipirer, C.Y., Faelen, M., and Couturier, M. (2001). Mobilization function of the pBHR1 plasmid, a derivative of the broad-host-range plasmid pBBR1. *J. Bacteriol.* 183, 2101–2110.
- Tauch, A., Schneiker, S., Selbitschka, W., Pühler, A., van Overbeek, L.S., Smalla, K., Thomas, C.M., Bailey, M.J., Forney, L.J., and Weightman, A. (2002). The complete nucleotide sequence and



environmental distribution of the cryptic, conjugative, broad-host-range plasmid pIPO2 isolated from bacteria of the wheat rhizosphere. *Microbiology* 148, 1637–1653.

Tun-Garrido, C., Bustos, P., González, V., and Brom, S. (2003). Conjugative transfer of p42a from *Rhizobium etli* CFN42, which is required for mobilization of the symbiotic plasmid, is regulated by quorum sensing. *J. Bacteriol.* 185, 1681–1692.

Tzfira, T., Li, J., Lacroix, B., and Citovsky, V. (2004). *Agrobacterium* T-DNA integration: molecules and models. *TRENDS Genet.* 20, 375–383.

Varsaki, A., Moncalián, G., del Pilar Garcillán-Barcia, M., Drainas, C., and de la Cruz, F. (2009). Analysis of ColE1 MbeC unveils an extended ribbon-helix-helix family of nicking accessory proteins. *J. Bacteriol.* 191, 1446–1455.

Vedantam, G., Knopf, S., and Hecht, D.W. (2006). *Bacteroides fragilis* mobilizable transposon Tn5520 requires a 71 base pair origin of transfer sequence and a single mobilization protein for relaxosome formation during conjugation. *Mol. Microbiol.* 59, 288–300.

Wang, A., and Macrina, F.L. (1995). Streptococcal plasmid pIP501 has a functional oriT site. *J. Bacteriol.* 177, 4199–4206.

Wang, J., Shoemaker, N.B., Wang, G.-R., and Salyers, A.A. (2000). Characterization of a *Bacteroides* mobilizable transposon, NBU2, which carries a functional lincomycin resistance gene. *J. Bacteriol.* 182, 3559–3571.
